1  
2  
3  
4  
5  
6  
7  
8  
9  
10  
11  
12  
13  
14  
15  
16  
17  
18  
19  
  
1

**Selection of single domain anti-transferrin receptor antibodies for blood-brain barrier transcytosis using a neurotensin based assay and histological assessment of target engagement in a mouse model of Alzheimer’s related amyloid-beta pathology**

Authors: Shiran Su<sup>1,2</sup>, Thomas J. Esparza<sup>1,3,4</sup>, & David L. Brody<sup>1,2,3,5\*</sup>

<sup>1</sup>Laboratory of Functional and Molecular Imaging, National Institute of Neurological Disorders and Stroke, National Institutes of Health, Bethesda, MD, USA

<sup>2</sup>Department of Biomedical Engineering, Washington University in St. Louis, St. Louis, MO, USA

<sup>3</sup>Center for Neuroscience and Regenerative Medicine, Henry M. Jackson Foundation for the Advancement of Military Medicine, Bethesda, MD, USA

<sup>4</sup>Henry M. Jackson Foundation for the Advancement of Military Medicine, Inc, Bethesda, MD, USA

<sup>5</sup>Department of Neurology, Uniformed Services University of the Health Sciences, Bethesda, MD, USA

\*Corresponding author

E-mail: david.brody@nih.gov or david.brody@usuhs.edu

## 20 Abstract

21 The blood-brain barrier (BBB) presents a major obstacle in developing specific diagnostic imaging agents  
22 for many neurological disorders. In this study we aimed to generate single domain anti-mouse  
23 transferrin receptor antibodies (anti-mTfR VHHs) to mediate BBB transcytosis as components of novel  
24 MRI molecular contrast imaging agents. Anti-mTfR VHHs were produced by immunizing a llama with  
25 mTfR, generation of a VHH phage display library, immunopanning, and *in vitro* characterization of  
26 candidates. Site directed mutagenesis was used to generate additional variants. VHH fusions with  
27 neurotensin (NT) allowed rapid, hypothermia-based screening for VHH-mediated BBB transcytosis in  
28 wild-type mice. One anti-mTfR VHH variant was fused with an anti-amyloid-beta (A $\beta$ ) VHH dimer and  
29 labeled with fluorescent dye for direct assessment of *in vivo* target engagement in a mouse model of  
30 AD-related A $\beta$  plaque pathology. An anti-mTfR VHH called M1 and variants had binding affinities to  
31 mTfR of <1nM to 1.52nM. The affinity of the VHH binding to mTfR correlated with the efficiency of the  
32 VHH-NT induced hypothermia effects after intravenous injection of 600 nmol/kg body weight, ranging  
33 from undetectable for nonbinding mutants to -6°C for the best mutants. The anti-mTfR VHH variant  
34 M1<sub>P96H</sub> with the strongest hypothermia effect was fused to the anti-A $\beta$  VHH dimer and labeled with  
35 Alexa647; the dye-labeled VHH fusion construct still bound both mTfR and A $\beta$  plaques. However, after  
36 intravenous injection at 600 nmol/kg body weight into APP/PS1 transgenic mice, there was no detectible  
37 labeling of plaques above control levels. Thus, NT-induced hypothermia did not correlate with direct  
38 target engagement in cortex. There was a surprising dissociation between NT-induced hypothermia,  
39 presumably mediated by hypothalamus, and direct engagement with A $\beta$ -plaques in cortex. Alternative  
40 methods to assess anti-mTfR VHH BBB transcytosis will need to be developed for anti-mTfR VHH  
41 screening and the development of novel MRI molecular contrast agents.

42

## 43 Introduction

44 Alzheimer's disease (AD) is one of the most important causes of dementia in the elderly [1]. About 6.2  
45 million Americans are living with AD, and it's predicted that the number will increase to 13.8 million by  
46 2050 [2]. With no effective therapies to cure or inhibit significant AD symptom progression [3], AD  
47 severely decreases patients' quality of life and creates an enormous burden on the health care system  
48 and society [1, 4]. Currently, clinical AD diagnosis is based on cognition and the relative impact of  
49 impairments on daily activities [5]. However, multiple neurodegenerative and vascular pathologies can  
50 coexist and produce cognitive and behavioral symptoms which could overlap with each other [6]. This  
51 makes it difficult to accurately identify pathology based solely on clinical symptoms. The accuracy of  
52 clinical diagnosis of AD at the National Institute of Aging and National Institute of Aging sponsored AD  
53 centers varies depending on the clinical and neuropathologic criteria used [7]. The sensitivity of AD  
54 diagnosis ranges from 70.9% to 87.3%, whereas specificity ranges from 44.3% to 70.8%, which need to  
55 be improved. AD has a very long prodrome stage before clinically observable symptoms [8]. Early  
56 diagnosis is preferred to help with early intervention and the development of preventive therapeutics to  
57 slow AD development [5]. Detection of patients in the preclinical stages of AD can also help to provide  
58 diagnostic information, monitor disease progression, and even monitor the effect of newly developed  
59 treatment methods. Imaging methods including MRI and PET have been developed to aid the diagnosis  
60 of AD [9, 10]. However, PET imaging for AD provides limited resolution and requires radiation exposure.  
61 Structural MRI lacks specificity and does not allow direct visualization of A $\beta$  or tau, the histological  
62 hallmarks of AD. There is an unmet need for developing methods like molecular contrast MRI which  
63 have better resolution than PET and better specificity than structural MRI imaging.

64

65 The blood-brain barrier (BBB) represents a significant obstacle in delivering diagnostic and therapeutic  
66 agents to the central nervous system (CNS), preventing uptake of more than 98% of potential  
67 neurotherapeutics to brain [11-14]. The BBB consists of endothelial cells held together by tight junctions  
68 which hinder paracellular passage. Most molecules do not transfer from blood to brain through the BBB,  
69 which protects the brain from toxicity and maintains brain homeostasis. Several methods have been  
70 developed to improve the transport of diagnostic and therapeutic agents into the CNS. For instance, the  
71 BBB may be temporarily opened by administration of hypertonic agents or focused ultrasound.  
72 Alternatively, very high doses of an agent can be given so that even if a small fraction enters the brain  
73 the desired effect will be achieved. In some cases, direct injection of agents into the cerebrospinal fluid  
74 can be employed [14]. However, these methods are invasive and have a risk of causing infection,  
75 toxicity, and neurological dysfunction [13, 14].

76  
77 BBB crossing based on receptor mediated transcytosis (RMT) is potentially especially promising. The use  
78 of protein shuttles has the potential to facilitate the transport of therapeutic agents across the BBB  
79 using specific endogenous receptor systems. Candidate receptor systems including transferrin receptors  
80 (TfR), low-density lipoprotein receptors, insulin receptors and neuropeptide receptors are highly  
81 expressed on the BBB where they mediate receptor-mediated transcytosis [13]. Among the different  
82 receptors, TfR has been widely used for transporting macromolecules across the BBB [15, 16]. Based on  
83 the study of Yu et al., there is a nonlinear relationship between an antibody's affinity for TfR and its  
84 uptake in brain. At tracer doses, antibodies with higher affinity to TfR have higher uptake into the brain,  
85 while at therapeutic doses, antibodies with lower affinity to brain have higher uptake into the brain [17].  
86 The effect of TfR affinity on brain uptake has been confirmed by the study of Wiley et al [18]. Transferrin  
87 conjugated gold nanoparticles with high avidity to TfR remain strongly attached to brain endothelial cells  
88 and reduced accumulation in brain parenchyma compared with nanoparticles with lower avidity to TfR

89 [18]. Thus, to achieve optimal brain uptake, it is important to optimize anti-TfR concentration and  
90 antibody affinity to TfR. Jefferies et al. identified a monoclonal antibody OX-26 specific for transferrin  
91 receptors [19]. This antibody was tested and was confirmed to be able to facilitate TfR-mediated  
92 transcytosis across BBB [20]. Kissel et al. produced monoclonal antibody 8D3 which recognizes murine  
93 transferrin receptor [21]. Yu et al. generated a bispecific antibody that binds to TfR for transcytosis and  
94 also to the enzyme  $\beta$ -secretase for inhibiting A $\beta$  production[17]. Hultqvist et al. attached a single chain  
95 variable fragment against TfR to the anti-amyloid-beta protofibril recombinant monoclonal antibody  
96 RmAb158. The anti-TfR single chain variable fragment increased brain uptake of the antibody by 80-fold  
97 [22]. However, most of the existing anti-TfR antibodies have relatively large size, especially when  
98 conjugated to additional components for RMT or other payloads such as imaging contrast agents.  
99 Previous research found that reducing the size of nanoparticles helped to improve blood brain barrier  
100 transcytosis [23] Keeping the size of each component small is important since the ultimate goal of this  
101 line of investigation is to develop multicomponent brain MRI molecular contrast agents. Also, it is  
102 expensive to engineer and synthesize monoclonal antibodies, which are typically produced in  
103 mammalian cell culture. Thus, there is an unmet need for smaller, less expensive, and easier to engineer  
104 system for BBB transcytosis.

105  
106 Camelids produce functional antibodies devoid of light chains called heavy chain-only antibodies  
107 (HCAbs) [24, 25]. HCAbs recognize their cognate antigens by one single domain, the variable domain  
108 (VHH). The VHH in isolation is very small compared with other antibodies. The molecular weights of  
109 VHHs are typically ~15kDa, which is about 1/10 of the molecular weight of a conventional IgG and about  
110 half the molecular weight of a single chain variable fragment (Scfv) [25, 26]. VHHs have affinities at the  
111 same order of magnitude as conventional IgGs, often in the nanomolar or subnanomolar range [27].  
112 Because of their small size, VHHs can also bind to epitopes not recognized by conventional antibodies

113 and can have better tissue penetration capacities [28, 29]. The factors governing VHH immunogenicity  
114 are similar to those for conventional antibodies and VHHs have been demonstrated to have low  
115 immunogenicity risk profile [30, 31]. Caplacizumab was the first VHH approved by FDA for treatment of  
116 acquired thrombotic thrombocytopenic purpura in humans [32]. There are several more VHHs which are  
117 in clinical trials, with safety profiles similar to other antibody therapeutics in humans [33, 34].  
118 Importantly, VHHs have been found that can facilitate BBB penetration and allow brain target binding.  
119 The use of VHHs for BBB transcytosis and target engagement is promising. Specifically, Stanimirovic et  
120 al. identified an insulin-like growth factor 1 receptor binding VHH which crosses the BBB by receptor  
121 mediated transcytosis [35, 36]. Danis et al. identified and optimized VHHs to mitigate brain  
122 accumulation of pathological tau in a tauopathy mouse model [37]. Dupre et al., identified VHHs which  
123 could be used to detect tau in transgenic mice brain tissues [38]. However, the extent to which VHHs  
124 that engage in receptor mediated transcytosis using the TfR can carry diagnostic and therapeutic  
125 payloads across the BBB still has not been assessed. Here we tested the hypothesis that VHHs that bind  
126 to TfR and cross the BBB through RMT in mice could be coupled with additional VHHs that bind to  
127 amyloid plaques as a proof of concept for a platform which could be generalized to other neurological  
128 diseases.

129

130 Current methods (ELISA or radioisotope detection) to evaluate BBB crossing require substantial  
131 resources and can be time-consuming [17, 39, 40]. An efficient way to screen for BBB crossing *in vivo*  
132 would be helpful since *in vitro* models may not be fully predictive of *in vivo* results [41]. Neurotensin  
133 (NT) is a 13 amino acid peptide first identified by Carraway and Leeman in 1973 from bovine  
134 hypothalamic extracts [42]. NT is expressed in CNS as well as in peripheral tissues, mostly in the  
135 gastrointestinal tract. NT is involved in regulating appetite, nociception, and thermoregulation in the  
136 CNS, and alters nutrient absorption, gastrointestinal motility, and secretion in the peripheral

137 gastrointestinal tract [43]. It was found that NT induces rapid and transient hypothermia in mice and  
138 rats when injected to CNS [44, 45]. The hypothermia was likely to be due to effects in hypothalamus.  
139 Young & Kuhar found that NT receptors had moderate to high densities in hypothalamus [46]. Injection  
140 of NT to medial, lateral preoptic area and anterior parts of hypothalamus induced the hypothermia  
141 effect [46]. Meanwhile, intravenously injected NT does not typically cause hypothermia [47]. On the  
142 other hand, when NT-conjugated mouse TfR (mTfR)-binding VHHs were injected intravenously to mice,  
143 the NT-mTfR VHH conjugates induced hypothermia in mice, presumably because they get across the  
144 BBB and bind to NT receptors in hypothalamus [39, 48]. These properties of the NT system make it an  
145 apparently attractive assay platform for rapid testing of VHH BBB transcytosis.

146

147 Here, we independently generated additional mTfR-binding VHHs and used a similar NT based modular  
 148 system to screen these VHHs for mTfR-mediated BBB transcytosis (**Fig 1**). We hypothesized that this

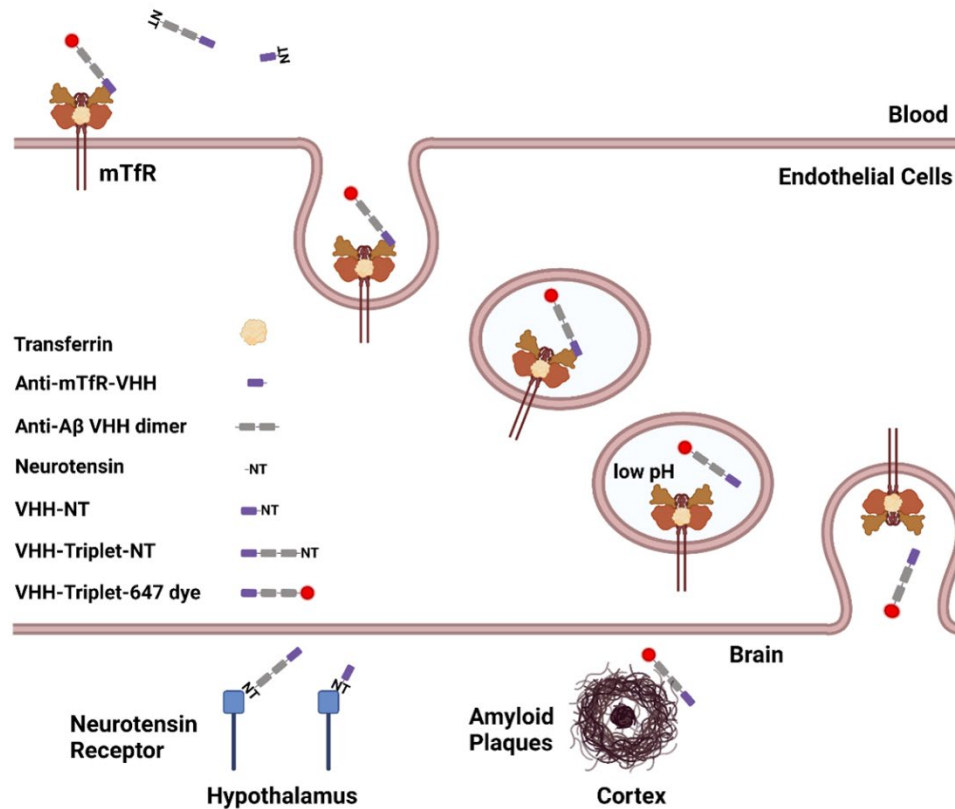

**Fig 1. Schematic of the modular system for VHH-mediated BBB transcytosis and target engagement.** Module 1: anti-mTfR VHH for RMT across BBB. Module 2: neurotensin peptide (NT) for rapid assessment of *in vivo* target engagement via measurement of hypothermia. Module 3: anti-A $\beta$  VHH dimer for disease-relevant target engagement in brain parenchyma. Module 4: 647 dye for visualization of VHH constructs *in situ*. The anti-mTfR VHH was combined with NT for anti-mTfR VHH screening through monitoring hypothermia effect. The anti-mTfR VHH were combined with VHH dimer and NT or 647 to test the effect of anti-mTfR VHH together with other components of the module. This schematic figure also shows the TfR mediated transcytosis across BBB. The anti-mTfR VHH conjugates binds to TfR on the endothelial cells which comprise a major portion of the BBB. Then the TfR-VHH complex is endocytosed across the endothelial cells in the endosomes. VHHs dissociate from the TfR-VHH complex with decreased pH level in endosome and are released on the brain side of the BBB. There were two different targets in the brain parenchyma in this study, the NT receptor in hypothalamus and amyloid plaques in cortex and hippocampus. (Figure generated using BioRender.com)

149 modular screening system can be used to identify and optimize anti-mTfR VHHs for BBB transcytosis and  
 150 brain target binding.

151 This screening system includes four modules. The first module is an anti-mTfR VHH for receptor  
 152 mediated transcytosis across the BBB; the second module is the neurotensin peptide for assessment of  
 153 target engagement *in vivo* through measurement of hypothermia. The third module is a dimer of anti -



154 A $\beta$  VHHs for disease-relevant brain target engagement. The fourth module is a fluorescence dye for  
155 visualization of VHH constructs in situ. We tested different VHH variants and found one variant which  
156 showed good BBB penetration based on this screening system. The VHH variant with the best BBB  
157 transcytosis ability fused to a tandem VHH dimer called Nb3-Nb3 which binds to amyloid plaques in  
158 brain parenchyma. This VHH triplet was conjugated to a fluorescent dye and post-mortem confocal  
159 microscopy was performed to directly evaluate brain target engagement.

160

## 161 **Materials and Methods**

### 162 **Immunization of llama with mouse transferrin receptor**

163 A single adult male llama (*Lama glama*) was immunized under contract agreement through Triple J  
164 Farms (Kent Laboratories, Bellingham, WA) following the method previously described [49]. Briefly,  
165 subcutaneous injections of 100  $\mu$ g ectodomain (Cys89-Phe763) mTfR (50741-M07H, SinoBiological)  
166 (synthesized in HEK293 cells and went through glycosylation) were performed with protein emulsified  
167 with complete Freund's adjuvant on day 0, followed by additional 100  $\mu$ g immunizations emulsified with  
168 incomplete Freund's adjuvant on days 14, 28, and 42. On day 49, peripheral blood was drawn for  
169 peripheral blood mononuclear cell (PBMC) isolation. Triple J Farms operates under established National  
170 Institutes of Health Office of Laboratory Animal Welfare Assurance certification number A4335-01 and  
171 United States Department of Agriculture registration number 91-R-0054.

### 172 **Generation of VHH immune phage display library**

173 The generation of an immune phage display library and isolation of mTfR binding VHH clones was  
174 performed using the methods previously described [49]. Briefly, total RNA extracted from PBMCs was

175 used for synthesis of first-strand complimentary DNA (cDNA) using the SuperScript IV First-Strand  
176 Synthesis kit (#1891050, Invitrogen). The heavy-chain variable domain was then amplified from the  
177 cDNA using Q5 high-fidelity DNA polymerase (New England Biolabs) with the described primers  
178 (CALL001: 5' -GTCCTGGCTGCTCTTCTACAAGG-3' and CALL002: 5' -GGTACGTGCTGTTGAACTGTTCC-  
179 3'). The heavy-chain specific amplicon was isolated using electrophoresis with low-melting point agarose  
180 extraction with the QIAquick Gel Extraction kit (Qiagen). A secondary amplification was performed using  
181 a modification of the primers (VHH-Esp-For: 5' -  
182 CCGGCCATGGCTGATGTGCAGCTGCAGGAGTCTGGRGGAGG-3' and VHH-Esp-Rev: 5' -  
183 GTGCGCCGCTGAGGAGACGGTGACCTGGG T-3' ) used by Pardon et al. to facilitate cloning into the  
184 phagemid pHEN2 [50]. The amplified sequences were cleaved with the restriction endonucleases NcoI  
185 and NotI (New England Biolabs) and subsequently ligated into compatibly cleaved pHEN2 phagemid at a  
186 3:1 (insert:phagemid) ratio overnight at 16°C followed by purification. The resulting ligation mixture was  
187 electroporated into TG-1 phage-display competent cells (#60502-1, Lucigen) and plated onto 2xYT agar  
188 containing 100 µg/mL carbenicillin and 2% (w/v) glucose at 37°C overnight. The resulting library  
189 contained > 10<sup>7</sup> independent clones. Phage was produced for screening using the M13KO7 helper phage  
190 (#18311019, Invitrogen) followed by precipitation by addition of one-fifth volume 20% polyethylene  
191 glycol 6000 / 2.5 M sodium chloride solution on ice and centrifugation to purify the phage particles.

192

### 193 **Immunopanning and clone screening**

194 Selection of mTfR specific VHH was performed using direct binding of phage to immobilize mTfR.  
195 Standard radioimmunoassay (RIA) tubes were coated with 500 µL mTfR solution at 5 µg/mL in sodium  
196 carbonate buffer, pH 9.6 overnight at 4°C. The coating solution was removed, and the RIA tube filled

197 with a 2% (w/v) non-specific blocking solution (bovine serum albumin or nonfat dry milk) in 1x  
198 Phosphate Buffered Saline (PBS). Amplified phage ( $\sim 10^{11}$  phage) was mixed with blocking solution to a  
199 final volume of 500  $\mu$ L and then transferred into the RIA tube to allow for association at room  
200 temperature and 600 rpm mixing. The RIA tube was then washed 20 times with 1x PBS and then the  
201 bound phage eluted with 100 mM triethylamine solution for 20 mins. The eluted phage solution was  
202 neutralized with 1:10 volume 1 M Tris-HCl, pH 8.0. The eluted phage was amplified in TG-1 cells and a  
203 second round of immunopanning was performed.

204

205 Following the second round of immunopanning, individual colonies were selected and cultured in 96-  
206 well blocks containing 2xYT containing carbenicillin at 37°C with 300 rpm shaking for 4-6 hours.  
207 Expression of VHH was induced by addition of isopropyl-beta-D-thiogalactoside (IPTG) to a final  
208 concentration of 1 mM and incubation overnight at 37°C. The culture blocks were centrifuged to pellet  
209 the cells and frozen at -80°C for 1 hour following removal of the culture supernatant. The culture block  
210 was then equilibrated to room temperature and 500  $\mu$ L 1xPBS added to each well followed by shaking at  
211 1500 rpm to resuspend the cell pellets and allow for release of VHH from the cells. The culture block was  
212 centrifuged for 20 min at 2000xg. Nunc Maxisorp plates were coated with mTfR at 1  $\mu$ g/mL as described  
213 above and blocked with 1% bovine serum albumin (BSA). The clarified VHH supernatants were incubated  
214 on the mTfR plates for 1 hour at room temperature. The assay plate was washed and peroxidase  
215 conjugated goat anti-alpaca VHH domain specific antibody (#128-035-232, Jackson ImmunoResearch) at  
216 0.8  $\mu$ g/mL was transferred to the plate and incubated for 1 hour at room temperature. Following a final  
217 wash, the assay was developed by addition of tetramethylbenzidine (#T5569, Sigma-Aldrich) and  
218 absorbance was measured at 650 nm on a Biotek Synergy 2 plate reader. Clones with absorbance values  
219 greater than two standard deviations above background were considered of interest and subsequently  
220 sequenced.

221

## 222 **Amyloid beta specific VHH production**

223 Paraschiv et al. previously reported the isolation of amyloid beta binding VHH clones [51]. We selected  
224 the sequence for the named Nb3 clone for use in this study. The Nb3 amino acid sequence was imported  
225 into SnapGene software (GSL Biotech LLC) and reverse translation performed using preferred codon  
226 usage for expression in *E. coli*. Additional sequence, including a (Gly-Gly-Gly-Ser)<sub>3</sub> between VHH  
227 domains, was incorporated for cloning into pHEN2 as a tandem dimer as part of the heterotrimer clones  
228 synthesized with TfR binders. To reduce the potential for recombination events, the DNA sequence was  
229 manually curated to adjust the codon usage and reduce the frequency of repetitive sequence within the  
230 Nb3-Nb3 dimer. The affinity of the Nb3-Nb3 dimer was measured using bio-layer intergerometry as  
231 described below.

## 232 **Bio-layer interferometry (BLI) assessment of VHH binding kinetics**

233 The binding kinetics of the selected VHH clone against mTfR and A $\beta$  was assessed by BLI. For  
234 measurements of mTfR kinetics, biotinylated VHH was diluted into assay buffer at 1  $\mu$ g/mL and  
235 immobilized onto streptavidin coated biosensors (#18-5019, Sartorius) to a minimum response value of  
236 1 nm on the Octet Red96 System (Sartorius). For measurements of amyloid beta, beta-amyloid(1-40)-  
237 Lys(biotin-LC) (AS-23517, Anaspec), was diluted into assay buffer at 1  $\mu$ g/mL and immobilized onto  
238 streptavidin coated biosensors (#18-5019, Sartorius) to a minimum response value of 1 nm on the Octet  
239 Red96 System (Sartorius). Purified mTfR or VHH clones were diluted into assay buffer at the specified  
240 concentrations. The immobilized antigen biosensors were allowed to associate at 37C° followed by  
241 dissociation in the baseline buffer well location. All assays included a background correction condition to  
242 allow for sensor normalization. The ForteBio Data Analysis suite was used to normalize the association  
243 curves following background subtraction and Savitzky-Golay filtering. Curve fitting was applied using

244 global fitting of the sensor data and a steady state analysis calculated to determine the association and  
245 dissociation constants. All assay steps were prepared in Greiner 96-well plates (#655209) in a volume of  
246 300  $\mu$ L. Assay buffer was defined as 0.1% BSA (w/v) in 1xPBS.

## 247 **Synthesis and expression of VHH constructs**

248 Based on the methods described in **Immunopanning and clone screening** and **BLI assessment of VHH**  
249 **binding kinetics** sections, we synthesized several neurotensin-fused VHH monomers with different  
250 binding affinities to mouse transferrin receptor. In addition, we produced single polypeptide VHH  
251 heterotrimers that consisted of M1<sub>P96H</sub>, a (Gly-Gly-Gly-Ser)<sub>3</sub> linker, Nb3, a (Gly-Gly-Gly-Ser)<sub>3</sub> linker, and  
252 Nb3 using the method described in **Amyloid beta specific VHH production**. The VHH dimer Nb3-Nb3  
253 binds to amyloid plaques in brain parenchymal of APP/PS1 mice. These constructs were termed “M1<sub>WT</sub>-  
254 NT”, “M1<sub>P96H</sub>-NT”, “M1<sub>AA</sub>-NT”, “M1<sub>R100dH</sub>-NT” and “M1<sub>P96H</sub>-triplet”. The VHH naming convention for P96H  
255 and R100dH are based on the Kabat nomenclature and refer to the specific amino acid residue  
256 modification positions within the VHH sequence [52]. Another neurotensin fusion with a VHH generated  
257 against human TfR, which does not bind mouse TfR called “H1-NT,” was used as control. All VHH  
258 constructs were designed using SnapGene Software and synthesized (Twist Bioscience) with  
259 corresponding restriction endonuclease sites for direct cloning into pHEN2. Sequence confirmed pHEN2  
260 clones with the various constructs were transferred into BL21(DE3) competent *E. coli* cells (C25271, New  
261 England Biolabs). Transformed cells were grown in terrific broth medium containing carbenicillin at 37°C  
262 and 300rpm shaking in baffled flasks. Once the culture density reached an optical density equal to 0.6,  
263 IPTG was added to a final concentration of 1mM to induce protein expression. For monomer VHH  
264 expression the post-induction incubation temperature was maintained at 37C but reduced to 30C for  
265 the M1<sub>P96H</sub>-triplet. Following overnight expression, cells were pelleted by centrifugation and VHHs were  
266 extracted through osmotic shock and recovery of the periplasmic fraction [49, 53]. Clarified periplasmic

267 fraction was purified using HisPur™ Ni-NTA Resin (88222, Thermo Fisher Scientific) column  
268 chromatography. The eluted VHH proteins were further purified by size-exclusion chromatography (SEC)  
269 over a Superdex75 10/300 column on an AKTA Pure (Cytiva). Protein purity was assessed by SDS-PAGE  
270 on a 10% Bis-Tris MES acrylamide gel and found to be >95% pure.

271 M1<sub>P96H</sub>-triplets and H1-triplets were fluorescently labeled with using Alexa Fluor™ 647 succinimidyl ester  
272 dye to allow fluorescence confocal microscopy of tissue sections. The triplets were incubated with the  
273 succinimidyl ester dye for 1 hour in 50mM sodium carbonate buffer, pH 9.6 and purified by desalting  
274 using a 5mL HiTrap desalting column in-line with the AKTA Pure. The binding fidelity of the VHH  
275 heterotriplet was assessed by ELISA against mTfR. The fluorescence dye labeled M1<sub>P96H</sub>-triplet and H1-  
276 triplet were named “M1<sub>P96H</sub>-triplet-647” and “H1-triplet-647”

## 277 **Endotoxin removal**

278 Removal of contaminating endotoxin was achieved using High-Capacity Endotoxin Removal Resin  
279 (88270, Pierce) from the VHH preparations. A volume of 0.25ml endotoxin removal resin was added to  
280 1ml of VHH sample. The VHH and resin were mixed for 2hr at room temperature to allow for absorption  
281 of endotoxin. The mixture was centrifuged to pellet the resin and the supernatant collected. A volume of  
282 0.25ml fresh endotoxin removal resin was added to the first-pass solution and mixed for another 2hr at  
283 room temperature. Following a final centrifugation to pellet the resin, the solution was collected for  
284 endotoxin level testing. Endotoxin levels were measured using the Chromagenic Endotoxin Quant kit  
285 (A39552, Pierce) according to the manufacturers protocol to ensure a level of endotoxin <0.5 endotoxin  
286 units/mg of total protein.

## 287 **Binding assessment of histidine mutations by ELISA**

288 To determine the effect on histidine mutation introduction, an ELISA was performed with the post VHH  
289 binding wash buffer at normal and reduced pH. Nunc Maxisorp plates were coated with mTfR at 1  
290  $\mu\text{g}/\text{mL}$  in 50mM sodium carbonate, pH 9.6 overnight at 4°C. The plates were blocked with 1% BSA in  
291 1xPBS buffer and then triplicate dilutions of each VHH prepared in 0.5% BSA in 1xPBS buffer and  
292 transferred to the plate. Binding at room temperature for 2 hours was followed by three cycles of 5-  
293 minute washes with either 1xPBS, pH 7.2 or 1xPBS, pH 5.5. Following the pH dependent wash step, the  
294 bound VHH was detected with peroxidase conjugated goat anti-alpaca VHH domain specific antibody  
295 (#128-035-232, Jackson ImmunoResearch) at 0.8  $\mu\text{g}/\text{mL}$  incubated for 1 hour at room temperature.  
296 Following a final wash, the assay was developed by addition of tetramethylbenzidine (#T5569, Sigma-  
297 Aldrich), the reaction was terminated by addition of 50  $\mu\text{L}$  1M hydrochloric acid and absorbance was  
298 measured at 450 nm on a Biotek Synergy 2 plate reader.

## 299 **Animals**

300 All animal experiments were conducted under protocol approved by the National Institute of  
301 Neurological Disorders and Stroke (NINDS)/ National Institute on Deafness and Other Communication  
302 Disorders (NIDCD) Animal Care and Use Committee in the National Institutes of Health (NIH) Clinical  
303 Center (Protocol Number: 1406-21). C57BL/6J female mice were purchased from Jackson labs at 6-7  
304 weeks of age and used at 7-12 weeks of age. Fifteen mice were divided into five groups with three mice  
305 in each group to test the five VHH-NT fusions. Anesthetized mice were injected via tail vein with VHH-NT  
306 fusions: M1<sub>WT</sub>-NT, M1<sub>P96H</sub>-NT, M1<sub>AA</sub>-NT, M1<sub>R100dH</sub>-NT and H1-NT for screening. Experiments were  
307 performed at the same time each day. To confirm the result from the five VHH-NT fusions, a blinded  
308 replication experiment was performed with additional fifteen mice randomized using a random number  
309 generator into five groups with three mice in each group. Six mice were randomly assigned into two

310 groups to test the ability of VHH triplet-NT to get across the BBB after fused to anti-A $\beta$  dimer Nb3-Nb3.  
311 Three mice were injected with M1<sub>P96H</sub>-Triplet-NT and three mice were injected with H1-Triplet-NT.  
312 APP<sub>SWE</sub>/PSEN1dE9 (MMRRC Strain #034832) positive transgenic mice were purchased from Jackson labs  
313 [54, 55], maintained on a hybrid (C57BL/6xC3H) background, and raised under protocols approved by  
314 the National Institute of Neurological Disorders and Stroke (NINDS)/ National Institute on Deafness and  
315 Other Communication Disorders (NIDCD) Animal Care and Use Committee in the National Institutes of  
316 Health (NIH) Clinical Center. Ten transgenic mice ages between 13-15 months, eight males and two  
317 females, were randomly assigned to two groups. Five mice were injected with M1<sub>P96H</sub>-triplet-647 and  
318 five mice were injected with H1-triplet-647.

### 319 **Injection of VHH-NTs and VHH-triplet-647s**

320 Mice were anesthetized with 60% oxygen/ 40% medical air gas mixture containing 5% isoflurane in an  
321 induction box. After a stable anesthesia plane was established, mice were maintained at 1.5-2%  
322 isoflurane level. Artificial tears ointment was applied to prevent eye injury due to drying. Mice were  
323 placed on an electrical heating pad to maintain body temperature at 37C°. The VHH-NTs, M1<sub>WT</sub>-NT,  
324 M1<sub>P96H</sub>-NT, M1<sub>AA</sub>-NT, M1<sub>R100dH</sub>-NT and H1-NT were injected into wild-type C57BL/6J mice through the tail  
325 vein using a 30 Gauge needle in a single bolus at a dose of 600nmol/kg body weight in 1xPBS. The VHH-  
326 triplet-647s, M1<sub>P96H</sub>-triplet-647 and H1-triplet-647, were injected intravenously through single bolus  
327 injection at a dose of 1000nmol/kg body weight. Mice were maintained under anesthesia for  
328 approximately 2-3 minutes. Following the procedure, the mice were allowed to recover on a heating pad  
329 until fully ambulatory and then returned to their home cage with immediate access to food and water.

### 330 **Temperature measurement**



331 Infrared thermometry was used for temperature measurement using an infrared thermometer (Model#  
332 62 MAX+, Fluke). Abdominal fur was removed by application of topical depilatory cream prior to  
333 temperature measurement for precise data collection. Baseline temperature was measured three times  
334 before intravenous (IV) injection with a time interval of 30min between measurements. Then, mouse  
335 temperatures were measured at the time intervals of 30min, 1hr, 1.5hr, 2hr, 2.5hr, 3hr, 3.5hr, 4hr, 4.5hr  
336 and 5hr after injection. All temperature measurements were performed by investigators blinded to the  
337 identity of the injected VHH sample. Mice were briefly anesthetized (<20 seconds) with isoflurane for  
338 each temperature measurement. In preliminary experiments we confirmed that this brief anesthesia did  
339 not affect temperature.

#### 340 **Confocal microscopy of mice brains injected with triplet-647**

341 Two hours post IV injection mice were sacrificed under isoflurane anesthesia by cardiac perfusion with  
342 1X PBS + Heparin (10 units Heparin per milliliter 1X PBS). Following perfusion, mice were decapitated  
343 using a pair of sharp surgical shears and the brain was carefully excised from the cranium. Brains were  
344 fixed in 4% PFA for 24hrs then equilibrated in 30% sucrose for 48 hours. Then, mouse brains were  
345 sectioned at 50  $\mu$ m thickness using a freezing sliding microtome. Staining was performed to visualize  
346 amyloid plaques using the Congo Red derivative X34.[56] Tissue was rinsed with 1xPBS two times. Then,  
347 tissues were incubated in 40%EtOH/60%PBS at pH10 containing 10  $\mu$ M X34 (SML1954-5MG, Sigma) for  
348 10min. After X34 incubation, tissue was rinsed with milliQ water five times then differentiated in  
349 40%EtOH/60%PBS at pH10 for 2min. After differentiation, the tissue was rinsed with miliQ water for  
350 10min then mounted onto positively charged slides (EF15978Z, Daigger®). The mounted tissue sections  
351 were allowed to dry overnight at room temperature and cover slipped using fluoromount-G (00-4958-  
352 02, Invitrogen™).

353 To objectively evaluate the effect of intravenous injection of M1<sub>P96H</sub>-Triplet-647 and H1-Triplet-647 on  
354 APP/PS1 mice, brain sections at around 2.5mm posterior to bregma were selected for confocal  
355 fluorescence imaging. The brain sections were equally divided into 10 parts in both horizontal (x) and  
356 vertical (y) directions (**S1 Fig**). X and y coordinates were randomly selected using by random numbers  
357 from 1 to 10. When (x, y) coordinates fell onto a cortical area, stacks of images were taken which  
358 covered 16µm depth (z direction) starting from the top of the brain section. When (x, y) coordinates fell  
359 outside of the cortex, the microscope was moved to the next randomized (x, y) coordinates without  
360 taking images. Brain sections were imaged using a Zeiss LSM 510 microscope. Stacks of images were  
361 acquired with eight images per stack and 2µm optical thickness at 20x magnification using a Zeiss Plan-  
362 Apochromat 20x/0.8NA lens. Images were acquired using laser wavelength at 633nm to visualize the  
363 VHH triplets conjugated with 647 dye and 405 nm wavelength laser to visualize the X-34 dye. For 647  
364 channel images, laser at wavelength 633nm was used with a LP650 filter and laser power set to be at  
365 transmission 100%. For X34 channel images, laser at wavelength 405nm was used with a BP420-480  
366 filter and laser power set to be at transmission 15%. The images were exported in lsm file format for  
367 image analysis using ImageJ.

### 368 **Fluorescent confocal microscopy - Naïve brain as controls**

369 Naïve APP/PS1 positive mouse brain sections stained only with X-34 for fluorescence confocal  
370 microscopy were used as a negative control. Naïve APP/PS1 positive mouse brain sections stained with  
371 both X34 and *ex vivo* M1<sub>P96H</sub>-Triplet-647 for fluorescence confocal microscopy were used as a positive  
372 control. For *ex vivo* M1<sub>P96H</sub>-Triplet-647 staining, naïve brains were sectioned and washed in 1XPBS.  
373 Sections were incubated in 3% normal donkey serum for 30min to block non-specific binding. After  
374 blocking, tissue sections were incubated overnight at 4C° in M1<sub>P96H</sub>-Triplet-647 at a concentration of

375 10ug/ml in blocking solution. Tissues were then washed in 1xPBS three times followed by X34 staining as  
376 described.

### 377 **Automated image analysis**

378 To quantitatively analyze the confocal microscope images, thresholding and particle analysis were  
379 performed to remove background signals and isolate target structures of interest. The percent area of  
380 X34 stained amyloid plaques was quantified with thresholding at (0, 30) followed by Particle analysis. To  
381 remove low signal background, 647 channel image thresholding was set at 0-1000. Then the 647 channel  
382 images was analyzed with particle analysis. The parameters for particle analysis were set to be 0-1000  
383 pixels for size and 0.1-1.0 for circularity. The parameters for thresholding and particle analysis were  
384 determined through testing of different parameters to capture the qualitative morphology of amyloid  
385 plaques as assessed by experienced investigators. Amyloid plaque levels were represented as % area of  
386 X34 coverage and VHH triplet-647 entry into the brain parenchyma was represented as % area of Alexa  
387 647 dye coverage in the areas with X34 staining. Because there is mouse-to-mouse variability in plaque  
388 size and X34 staining intensity, we analyzed the ratio of the Triplet-647 coverage to X34 coverage.

### 389 **Statistical analysis**

390 Unpaired student t-test were performed to evaluate the differences between the transcytosis ability of  
391 M1<sub>P96H</sub>-triplet-647 and H1-triplet-647 to amyloid plaques in APP/PS1 transgenic mice brains. Graphs  
392 were created using Prism. Sample sizes were based on availability of transgenic mice and previous  
393 experiments. No formal power calculations were performed.

394

## 395 **Results**

## 396 **Endotoxin removal**

397 VHHs contamination by endotoxins is a byproduct of expression in *E. Coli* cells [57]. Endotoxin can  
398 induce systemic inflammation and cause disruptive BBB changes [58]. It was found that the excess  
399 endotoxin level in VHH-NT fusions can cause additional hypothermia (**S2 Fig**). To avoid potential  
400 hypothermia effects caused by endotoxin, endotoxin was removed after purification. After endotoxin  
401 removal, the level of endotoxin level in VHHs was less than 0.1 endotoxin unit/ml (EU/ml) within normal  
402 range [59].

## 403 **Anti-mTfR VHH variant screening based on binding affinity measurement**

404 VHH monomer-NT (M1-NT and H1-NT) and VHH-heterotrimer-NT (M1<sub>P96H</sub>-triplet-NT) had characteristics  
405 consistent with expectation. **S3 Fig and S4 Fig** showed the SDS-PAGE gel and exemplar size-exclusion  
406 column results of the VHH monomer-NT and VHH-heterotrimer-NT after purification. VHH monomer-  
407 NTs had size around 14kDa (**S3 Fig**) and VHH heterotrimer-NTs had size between 38-49kDa (**S4 Fig**).  
408 Histidine mutations could potentially impart pH dependence of binding [60]. Histidine protonation at  
409 lower pH-values can increase dissociation rate of antibodies to their receptors. Maeda et al. found that  
410 the dissociation rate was less rapid in the intracellular acidic compartments once histidine was deleted  
411 from human epidermal growth factor [61]. In this study, we generated different M1 variants based on  
412 the effect of histidine on VHH dissociation rate. **S5 Fig** shows the mTfR ELISA on M1 variants: M1<sub>P96H</sub>,  
413 M1<sub>WT</sub> and M1<sub>R100dH</sub>. Comparing M1 variant binding to mTfR under normal physiological pH (pH = 7.2) and  
414 acidic pH (pH = 5.5), lower pH did not alter the dissociation of M1<sub>WT</sub> to mTfR but substantially impacted  
415 the dissociation of M1<sub>P96H</sub> to mTfR.

416 Then the affinity of M1 variants to mTfR was measured using Octet. Based on Octet measurement, the  
417 affinity (KD) of M1<sub>WT</sub>-NT, M1<sub>P96H</sub>-NT, and M1<sub>R100dH</sub>-NT to mTfR were <1nM, 1.12nM, 1.52nM. While the  
418 affinity (KD) of M1<sub>AA</sub>-NT and H1-NT to mTfR was not detectable. **Fig 2** shows the association and

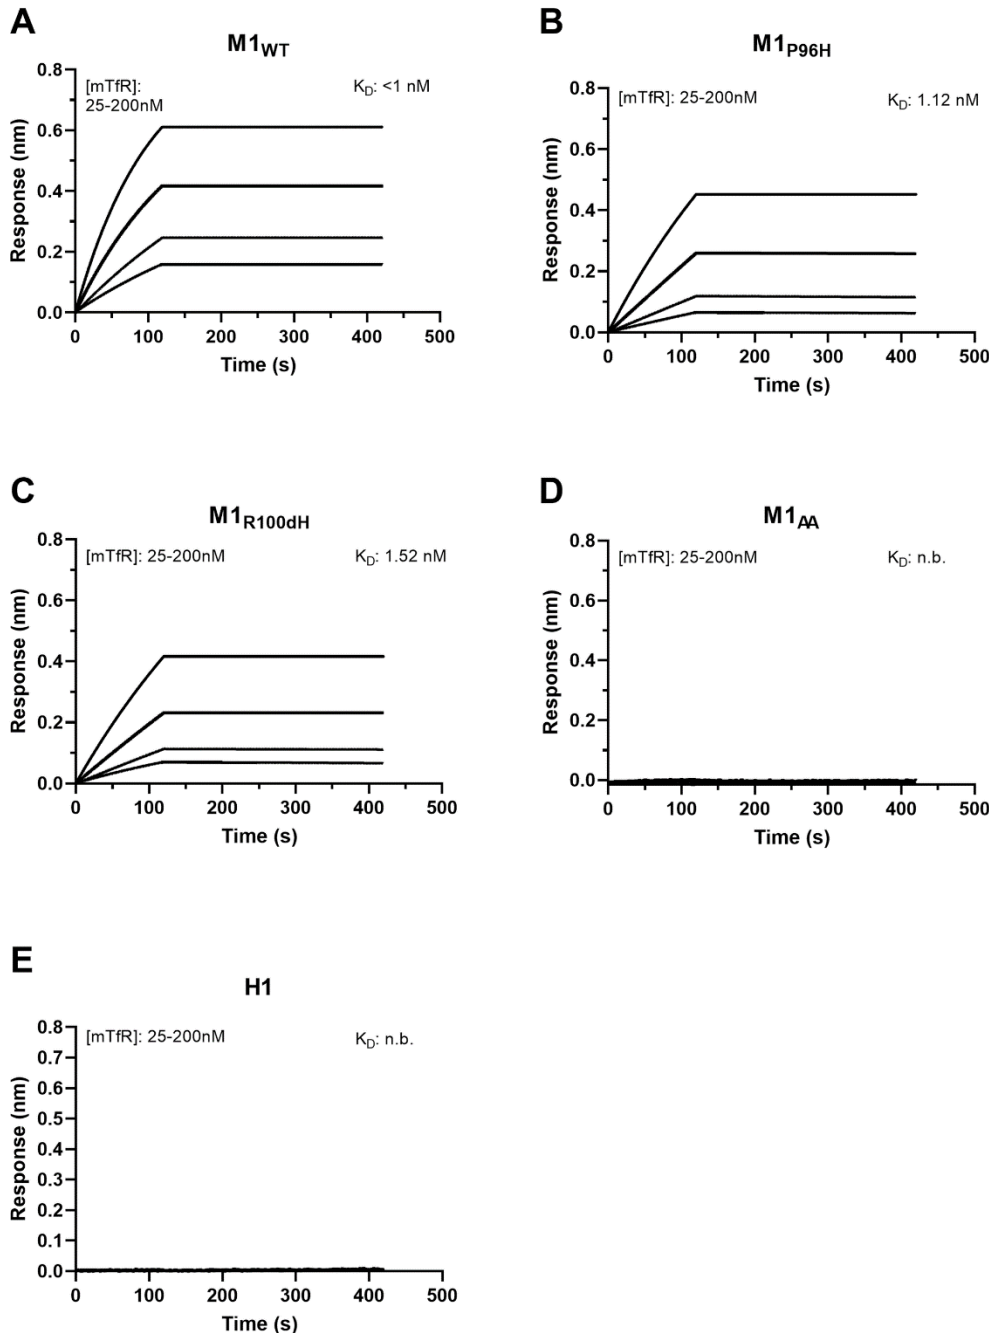

**Fig 2. Affinity binding curves of the five M1-NT variants: M1<sub>WT</sub>-NT (A), M1<sub>P96H</sub>-NT (B), M1<sub>R100dH</sub>-NT (C), M1<sub>AA</sub>-NT (D) and H1-NT (E) binding affinity ( $K_D$ ) to mTfR. Using biolayer interferometry on an Octet Red96 system, association and dissociation rates were determined by immobilizing biotinylated VHH onto streptavidin-coated optical sensors. The M1-NT variant association and dissociation curves to mTfR were plotted and the affinity of each to mTfR was calculated. (n.b. = no binding)**

419 dissociation curves of the M1<sub>WT</sub>-NT, M1<sub>P96H</sub>-NT, M1<sub>AA</sub>-NT, M1<sub>R100dH</sub>-NT and H1-NT to mTfR. M1<sub>WT</sub>-NT,  
420 M1<sub>P96H</sub>-NT, and M1<sub>R100dH</sub>-NT bond to mTfR well while M1<sub>AA</sub>-NT and H1-NT showed no binding. M1<sub>WT</sub>-NT  
421 and M1<sub>P96H</sub>-NT showed no binding to human TfR (data not shown).

422

## 423 M1 variant screening for BBB transcytosis using neurotensin fusion and 424 hypothermia assessment

425 To assess BBB transcytosis ability, several M1 variants were fused to NT and screened based on the  
426 extent of hypothermia effects. Three M1 variant NT fusions, including M1<sub>WT</sub>-NT, M1<sub>R100dH</sub>-NT and M1<sub>P96H</sub>-  
427 NT were injected to WT mice. NT alone was injected into WT mice at the same molarity as an initial  
428 negative control. At a dose of 600nmol/kg body weight, the M1 variants with different binding affinities  
429 to mTfR show different hypothermia effects (Fig 3). M1<sub>WT</sub>-NT reduced temperatures by approximately

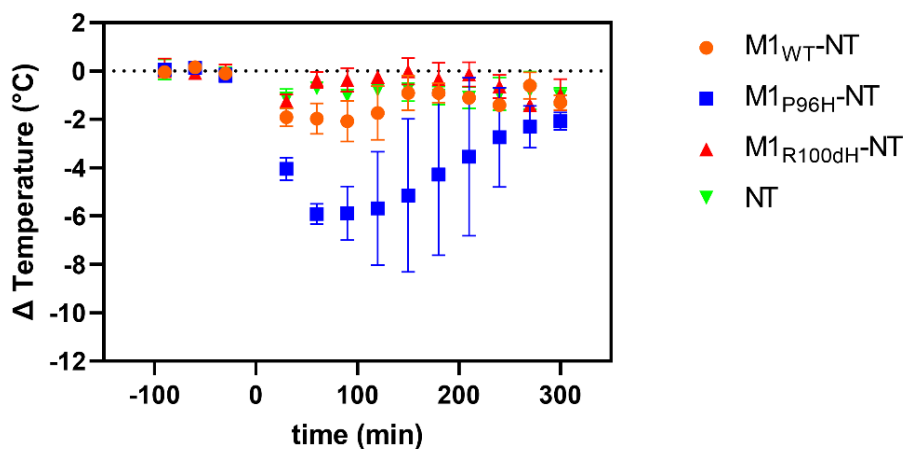

**Fig 3. The use of NT fusion to VHHs for VHH screening via hypothermia as an indication of CNS target engagement.** The M1 variants with different affinities to mTfR have different hypothermic effects. Among the three M1 variants injected to mice at the same dose 600nmol/kg body weight (n = 3 per group), M1<sub>P96H</sub>-NT produced the most prominent hypothermia effect, with a maximum temperature drop of about 6C° and duration for about 4hrs.

430 2C°, with an effect that lasted approximately 2 hours. M1<sub>P96H</sub>-NT, at the same dose, decreased  
431 temperature by 6C° with effects that lasted more than 4 hours, indicating that M1<sub>P96H</sub>-NT appeared to

432 improve CNS penetration. NT alone did not show any hypothermia effect, indicating that peripherally  
433 administered NT alone does not appear to cross the BBB into the CNS. M1<sub>R100dH</sub>-NT gave less than 2°C of  
434 hypothermia effect. Mouse body temperatures were stable at baseline.  
435 To confirm and extend these findings, a blinded experiment was performed. The previous three M1  
436 variants, plus a fourth mutant M1<sub>AA</sub>-NT that has minimal TfR binding and a different VHH that binds to  
437 human TfR called H1 were tested by an investigator blinded to the identity of the injected materials.  
438 M1<sub>AA</sub>-NT and H1-NT were tested at a higher molarity in a previous experiment and showed no obvious  
439 hypothermia effects (S6 Fig). The blinded experiment results were consistent with the previous finding:  
440 M1<sub>P96H</sub>-NT clearly reduced the temperature the most, with a maximum drop of about 4°C. The other M1-  
441 NTs and H1-NT did not reduce the temperature substantially (Fig 4). These results indicate that

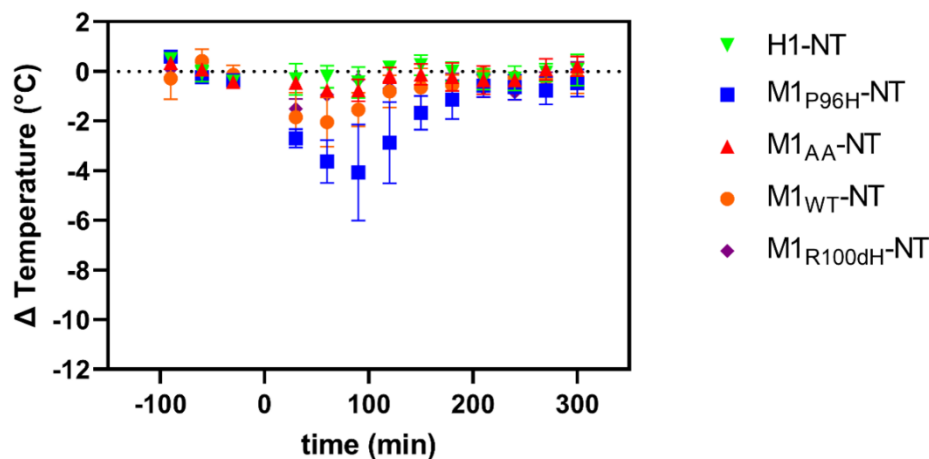

**Fig 4. Hypothermic effect of M1 VHH-NT fusions in a randomized, blinded cohort.** Five VHH-NT fusions M1<sub>WT</sub>-NT, M1<sub>P96H</sub>-NT, M1<sub>AA</sub>-NT, M1<sub>R100dH</sub>-NT and H1-NT were blinded by an independent investigator. Each blinded VHH-NT fusion was injected in a randomized fashion at a dose of 600nmol/kg body weight (n=3 per group) and body temperature measured over the indicated time interval. Following complete data collection of the temperature measurements, the results were unblinded. Consistent with previous finding, M1<sub>P96H</sub>-NT gave the most prominent hypothermia effect.

442 temperature measurement experiments facilitated the identification of an anti-mTfR VHH variant which  
443 induced substantial CNS effects.

#### 444 **M1<sub>P96H</sub>-NT dose effect**

445 To understand whether the amount of M1<sub>P96H</sub>-NT injected to mice affects the extent of hypothermia  
446 effects, we injected M1<sub>P96H</sub>-NT to WT mice at four different doses: 67nmol/kg body weight, 200nmol/kg  
447 body weight, 600nmol/kg body weight, and 1800nmol/kg body weight. Twelve mice were used in this  
448 experiment, with three mice at each dose (Fig 5). At the two lower doses, there was minimal

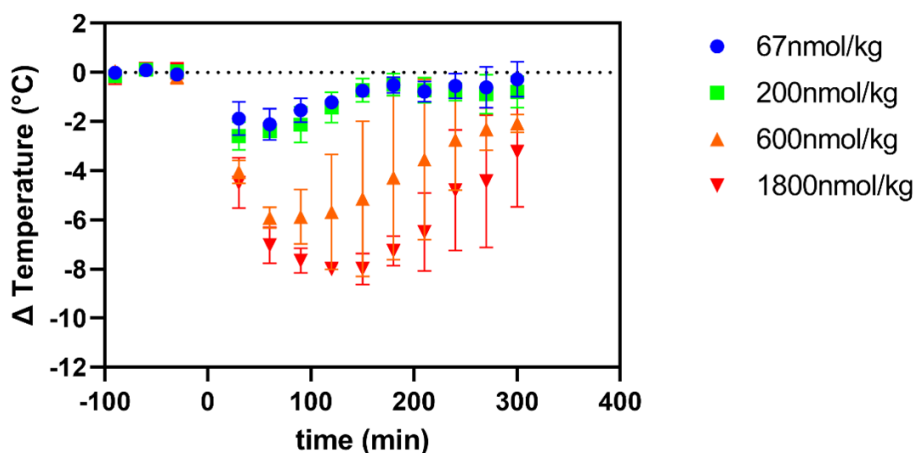

Fig 5. M1<sub>P96H</sub>-NT dose effect in WT mice after IV injection. This figure shows the dose effect of M1<sub>P96H</sub>-NT in WT mice after tail vein injection (n = 3 per group). The hypothermia effect was stronger and lasted longer time with dose increased from 67nmol/kg body weight to 1800nmol/kg body weight.

449 hypothermia effects. With increased M1<sub>P96H</sub>-NT concentration, the maximum temperature drop  
450 increased to about 8°C and also the duration of hypothermia was extended to as long as 5 hours. Thus,  
451 these was an apparently monotonic dose-response relationship between intravenous M1<sub>P96H</sub>-NT and  
452 hypothermia.

### 453 Temperature effect of M1<sub>P96H</sub>-Triplet-NT and H1-Triplet-NT

454 Based on the octet results and temperature measurement, M1<sub>P96H</sub> was chosen as the variant to use to  
455 assess ability to cross the BBB after conjugating to a payload. As a proof of concept, we used the anti-Aβ  
456 VHH dimer Nb3-Nb3 as the payload fused in a single polypeptide with M1<sub>P96H</sub> and NT and named M1<sub>P96H</sub>-  
457 Triplet-NT. The Nb3-Nb3 dimer was also fused to H1 and NT and named H1-Triplet-NT as a negative  
458 control. The M1<sub>P96H</sub>-Triplet-NT and H1-Triplet-NT were injected intravenously into six WT mice (three



459 mice for each Triplet-NT fusion). Body temperature was measured as described in the Temperature  
460 measurement section. **Fig 6** shows the temperature change after tail vein injection of M1<sub>P96H</sub>-Triplet-NT

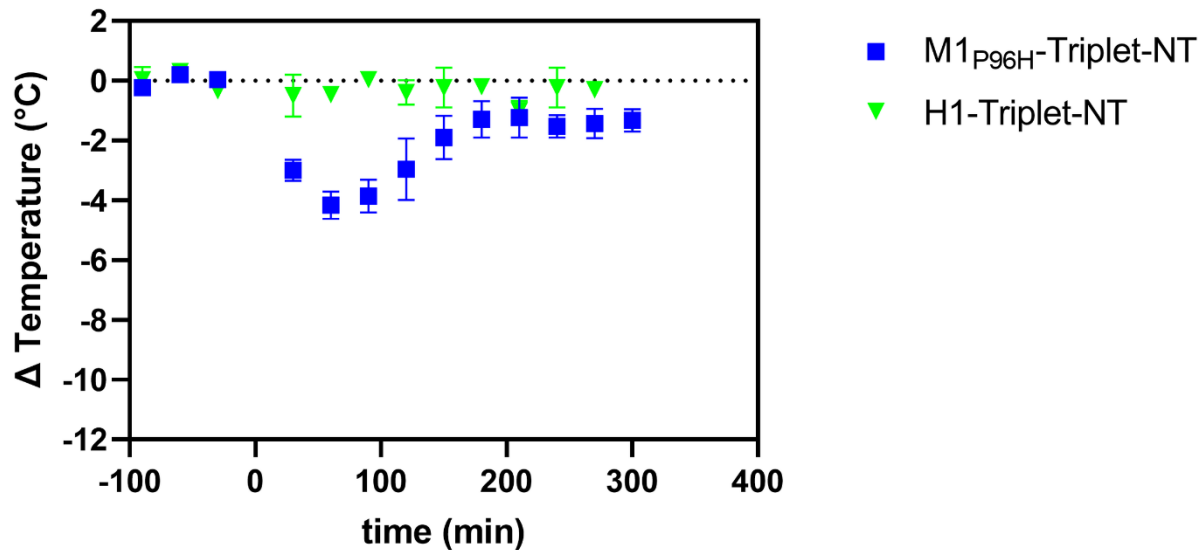

**Fig 6. Measurement of M1<sub>P96H</sub>-Triplet-NT and H1-Triplet-NT hypothermia effect.** M1<sub>P96H</sub>-Triplet-NT and H1-Triplet-NT were injected at dose of 600nmol/kg body weight (n = 3). M1<sub>P96H</sub>-Triplet-NT caused a temperature drop of about 4C° and H1-Triplet-NT caused no temperature drop.

461 and H1-Triplet-NT. For M1<sub>P96H</sub>-Triplet-NT, there was about 4C° temperature drop after the intravenous  
462 injection and the hypothermia effect peaked at about 1 hour post injection. There was no substantial  
463 hypothermia effect after intravenous injection of H1-Triplet-NT. This result confirmed that after fusing  
464 to an anti-A $\beta$  VHH dimer payload, the M1<sub>P96H</sub>-Triplet-NT was still able to get across the BBB and exert a  
465 CNS effect.

## 466 Affinity measurement of VHH-Triplet

467 To confirm that fusion with Nb3-Nb3 did not affect the binding ability of M1<sub>P96H</sub> and Nb3-Nb3 dimer to  
468 their targets, the affinity of M1<sub>P96H</sub>-triplet to mTfR and to A $\beta$  were measured to be 1.63nM and 9.98nM  
469 using Octet (**S7 Fig**). The affinity of the M1<sub>P96H</sub>-triplet to mTfR was on the same order before and after  
470 the fusion. The affinity of H1-Triplet-647 to mTfR and A $\beta$  was also assessed using Octet and measured to

471 be no binding to mTfR and 9.44nM to A $\beta$  (**S7 Fig**). It was verified that the fusion of M1<sub>P96H</sub> and H1 to VHH  
472 dimer Nb3-Nb3 did not change their binding affinities.

473 To ensure that the dye labeling did not affect M1<sub>P96H</sub>-triplet binding to mTfR, a mTfR ELISA on M1<sub>P96H</sub>-  
474 triplet before and after Alexa 647 dye labelling was performed. The binding curves before and after  
475 labeling overlapped with each other (**S8 Fig**), indicating that the Alexa 647 dye labeling did not affect the  
476 binding.

477 **Direct assessment of brain target engagement after intravenous injection of**  
478 **VHHs using confocal microscopy**

479 VHH-Triplets were injected to APP/PS1 positive transgenic mice to directly assess brain target (A $\beta$ )  
480 engagement. Ten transgenic mice were randomized into two groups, with five mice in each group. Five  
481 mice were injected with M1<sub>P96H</sub>-Triplet-647 and five mice were injected with H1-Triplet-647 as a  
482 negative control which does not bind to mTfR. Because the hypothermia effect was most prominent in  
483 the first two hours post injection in previous experiments using NT fusions, transgenic mice were

484 sacrificed two hours post IV injection. **Fig 7** shows exemplar confocal images of brains injected with

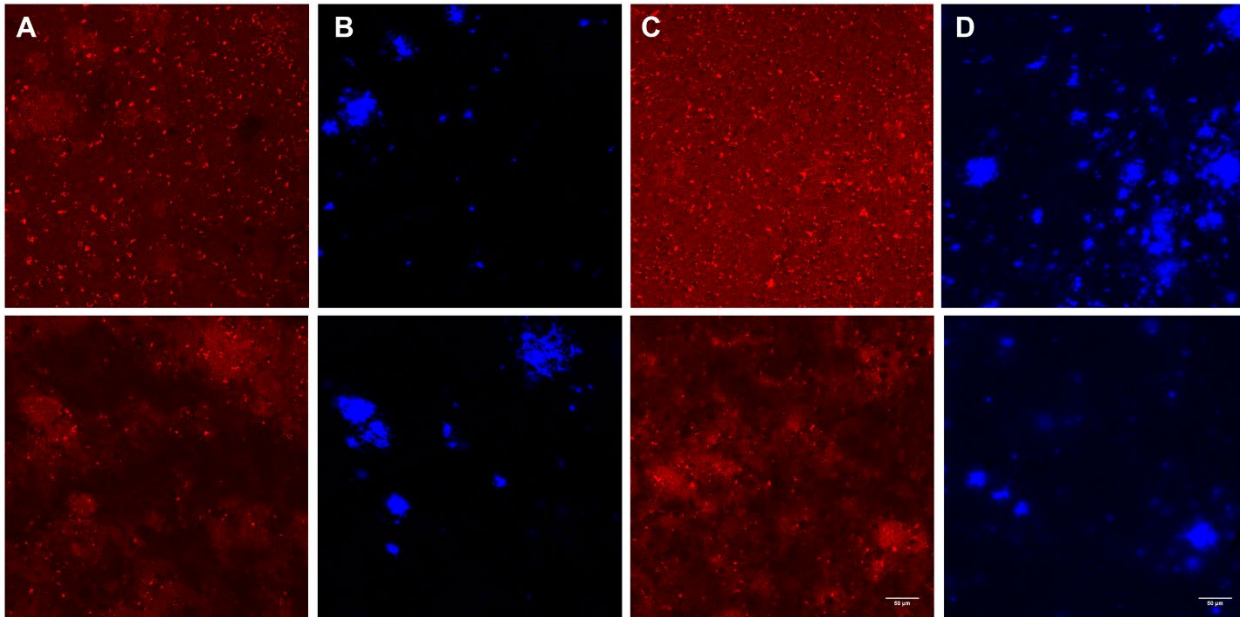

**Fig 7. Representative immunofluorescent confocal microscopy of mice brains 2 hours after intravenous injection.** 647 channel (A) and X34 channel (B) microscopy of mice brains injected with H1-Triplet-647. 647 channel (C) and X34 channel (D) microscopy of mice injected with M1<sub>P96H</sub>-Triplet-647.

485 M1<sub>P96H</sub>-triplet-647 or H1-triplet-647. From the exemplar images, it appeared that most of the 647 signals  
486 were similar to background, with some areas that had morphology consistent with amyloid plaque  
487 labeling. However, surprisingly, the confocal imaging patterns were similar in both M1<sub>P96H</sub>-triplet-647  
488 and H1-triplet-647 injected mice, suggesting a modest amount of non-specific BBB crossing and A $\beta$   
489 plaque binding plus background autofluorescence, rather than the expected extensive mTfR-mediated  
490 transcytosis and A $\beta$  plaque binding.

491 To confirm that the lack of anti-A $\beta$  plaque binding after IV injection by M1<sub>P96H</sub>-triplet-647 was not caused  
492 by the inability of the Nb3-Nb3 to label A $\beta$  in the context of the M1<sub>P96H</sub>-triplet-647 fusion construct, an  
493 *ex vivo* labeling experiment was performed. We labeled brain sections from a naïve APP/PS1 positive  
494 mouse with M1<sub>P96H</sub>-Triplet-647 using modest concentrations and no antigen retrieval. **Fig 8** shows that  
495 the Nb3-Nb3 dimer part of M1<sub>P96H</sub>-Triplet-647 was able to bind to amyloid plaques, with substantially  
496 enhanced fluorescence signals in areas of plaques. Thus, the modest plaque labeling after intravenous

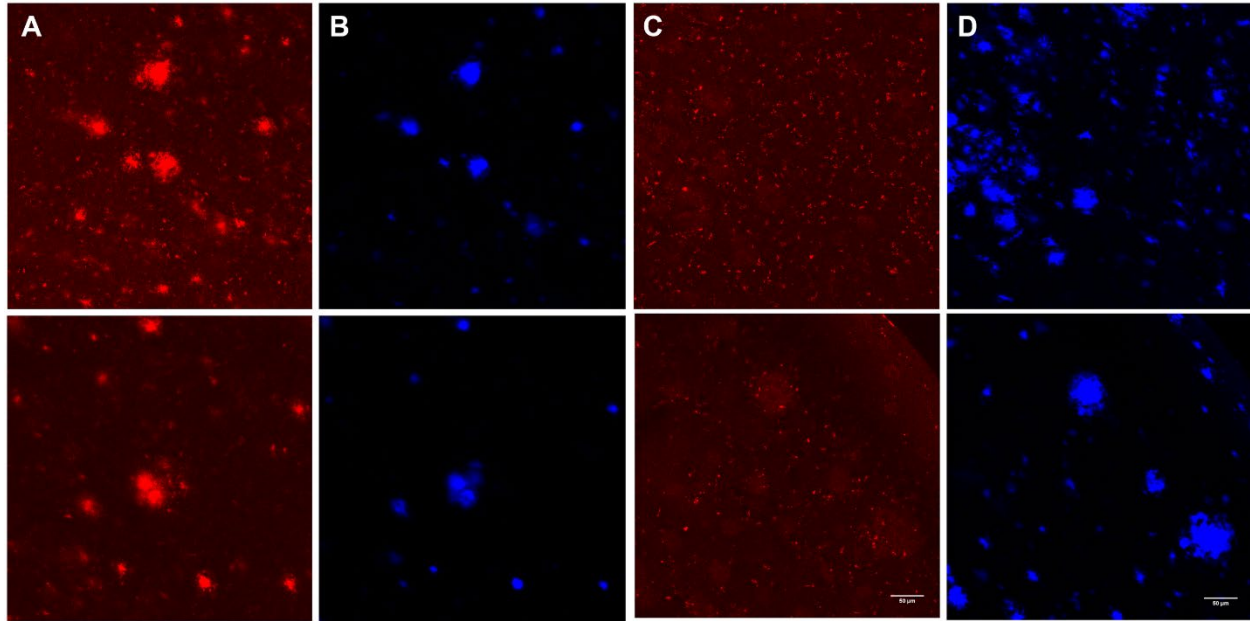

**Fig 8. Representative immunofluorescent confocal microscopy of ex vivo APP/PS1 positive mouse brain sections.** 647 channel (A) and X34 channel (B) microscopy of the ex vivo brain sections labeled with M1<sub>P96H</sub>-Triplet-647. 647 channel (C) and X34 channel (D) microscopy of the ex vivo brain sections without M1<sub>P96H</sub>-Triplet-647 labeling.

497 injection with M1<sub>P96H</sub>-triplet-647 is not likely to be attributed to lack of plaque binding affinity.

498 Autofluorescence was relatively modest in the 647 channel in sections labeled with only X34 (Fig 8C, D).

499 Because of the possibility of subconscious bias in selecting regions for imaging and to assess for more

500 subtle quantitative differences between M1<sub>P96H</sub>-triplet-647 and H1-triplet-647 plaque labeling, we

501 performed randomized, blinded, automated analyses of the brain sections to objectively compare the

502 confocal imaging results. Eleven or twelve confocal stacks of images were acquired at randomly selected

503 x, y coordinates in cortex (S1 Fig). Confocal images of brain sections were processed using ImageJ for

504 quantitative assessment.

505 The % area of X34 coverage, % area of Triplet-647 coverage and the % area ratio of Triplet-647/X34

506 coverage were averaged across the eleven to twelve images stacks acquired for each mouse brain. The

507 average values of % area of each mouse brain was plotted in Fig 9 Comparing mouse brains injected

508 with M1<sub>P96H</sub>-triplet-647 or H1-triplet-647, the average values of % area of Triplet-647 coverage/% area

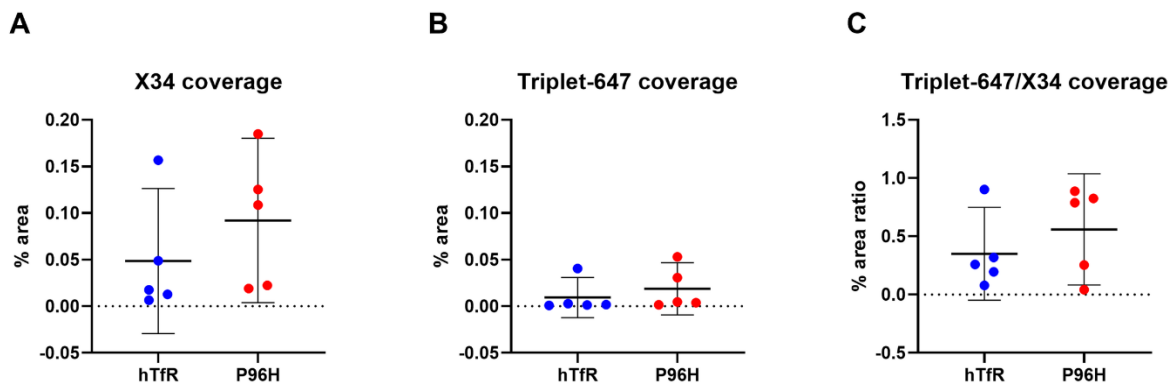

**Fig 9. % area and % area ratio of X34 channel images and 647 channel images.** (A) The % area of X34 coverage in the X34 images. There was no significant difference for mice injected with H1-triplet-647 or M1<sub>P96H</sub>-triplet-647; unpaired student t-test,  $p=0.3341$  (B) The % area of Triplet-647 coverage in 647 channel images. There was no significant difference for mice injected with H1-triplet-647 or M1<sub>P96H</sub>-triplet-647; unpaired student t-test,  $p=0.4815$ . (C) The % area ratio of Triplet-647/X34 coverage. There was no significant difference for mice injected with H1-triplet-647 or M1<sub>P96H</sub>-triplet-647; unpaired student t-test,  $p=0.3788$ . 647 channel images and the ratio of 647 channel/X34 channel images.

509 X34 coverage had no significant difference (**Fig 9C**). There was also no significant difference for % area

510 X34 coverage or % area Triplet-647 coverage (**Fig 9A, B**).

## 511 Alternative Confocal Image Processing – thresholding and intensity

### 512 measurement

513 To ensure the finding was not affected by the specific analysis method, confocal images of brain sections

514 were analyzed in several alternative ways using ImageJ (**S9 Fig**). First, X34 images were alternatively

515 thresholded at (0, 10) and (0, 30) and were converted to binary images. Because amyloid-beta pathology

516 can extend beyond the boundaries of X34 positive fibrillar plaque cores, the X34 images thresholded at

517 (0, 30) were also processed with dilation in ImageJ to add pixels from the edges of plaques. These

518 plaque and peri-plaque regions identified on the X34 images were applied to the 647 channel images to

519 calculate the mean 647 signal of these regions. The mean 647 signals were averaged across image stacks

520 acquired for each mouse brain. The average values of mean 647 signals of each brain were plotted in **Fig**

521 **10**. There was no significant difference of the mean 647 signal between the two groups in any of these

522 analyses. These findings confirmed that there was no detectable receptor mediated transcytosis of

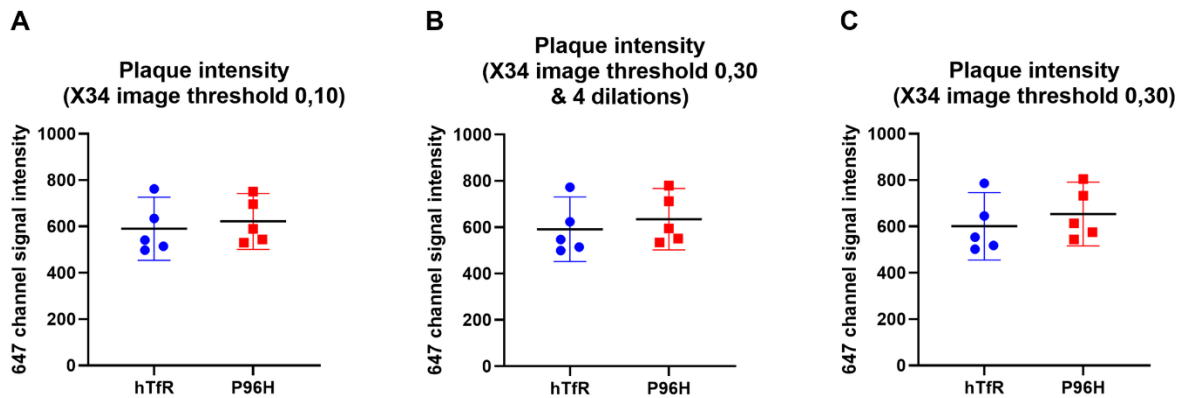

**Fig 10. Averaged mean fluorescence in the 647 channel of plaques containing regions.** (A) The threshold for X34 images was set to be at (0, 10). There was no significant difference between the mean signals from mice injected with H1-triplet-647 and mice injected with M1<sub>P96H</sub>-triplet-647; unpaired student t-test,  $p = 0.6404$ . (B) The threshold for X34 images was set to be at (0, 30), then the image was eroded for four times. There was no significant difference between the mean signals from mice injected with H1-triplet-647 and mice injected with M1<sub>P96H</sub>-triplet-647; unpaired student t-test,  $p = 0.5527$ . (C) The threshold for X34 images was set to be at (0, 30). There was no significant difference between the mean signals from mice injected with H1-triplet-647 and mice injected with M1<sub>P96H</sub>-triplet-647; unpaired student t-test,  $p = 0.4829$ .

523 M1<sub>P96H</sub>-triplet-647 into the cortex, despite good evidence for a CNS effect for the same construct when  
524 fused to neurotensin.

## 525 Discussion

526 In this study, a modular system was designed to efficiently test the ability of anti-mTfR VHHs to cross the  
527 BBB using NT-induced hypothermia as a readout. Because only NT in the CNS can induce hypothermia  
528 effects [39, 46, 48, 62], experimentally measured hypothermia was used to infer the VHHs' ability to  
529 cross the BBB through transferrin receptor mediated transcytosis followed by VHH-NT fusion binding to  
530 neurotensin receptors. Using this NT-based screening system, this study successfully identified an anti-  
531 mTfR VHH variant, M1<sub>P96H</sub>, which has good binding properties to the mouse TfR and appeared to  
532 mediate BBB transport efficiently. To attempt to validate the ability of this anti-mTfR VHH to carry  
533 cargos across BBB, this anti-mTfR VHH was fused with an anti-A $\beta$  VHH dimer and fused to NT. The H1  
534 VHH was fused with anti-A $\beta$  VHH dimer and NT as negative control. The M1<sub>P96H</sub>-Triplet-NT retained  
535 substantial hypothermia effects while the H1-Triplet-NT showed no hypothermia effect after

536 intravenous injection. This finding confirmed the BBB transcytosis ability of M1<sub>P96H</sub>-Triplet-NT. However,  
537 the modular system for VHH screening does not appear to translate effectively into target binding in the  
538 cortex. To assess brain target engagement, M1<sub>P96H</sub>-triplet was conjugated to the fluorescent Alexa 647  
539 dye and the dye conjugates were injected intravenously into APP/PS1 positive transgenic mice. A similar  
540 VHH triplet dye conjugate, H1-triplet which does not binding mTfR was used as a control. Surprisingly,  
541 there was no significant difference of the amyloid plaque binding between these two VHH triplet dye  
542 conjugates. This result was not likely due to failure of plaque binding, because the VHH triplet dye  
543 conjugates bound plaques well in *ex vivo* experiments. Thus, the likely explanation for our findings was  
544 that the VHH triplet dye conjugates did not effectively cross the BBB in the cortex; the hypothermia  
545 effect induced by NT did not correspond to target engagement in cortex. The finding indicates that the  
546 use of NT as a rapid screening platform for anti-mTfR VHHs does not necessarily predict generalized  
547 cargo delivery across the BBB.

548

549 The lack of correspondence between NT induced hypothermia after intravenous injection and brain  
550 target engagement could be possibly explained by the concept that the BBB is not a unitary  
551 phenomenon, and the permeability of BBB may be different from brain region to brain region. The  
552 hypothalamus is the center for thermoregulation, and likely to be the site of action of NT in the brain.  
553 The preoptic area of hypothalamus contains microcircuitry through which cutaneous and core thermal  
554 signals are integrated for thermoregulation and temperature homeostasis [63, 64]. Studies have found  
555 that the interface between the median eminence and the arcuate nucleus of the hypothalamus is  
556 somewhat leaky to molecules in the circulation [65, 66]. Cheunsuang et al. confirmed the specialized  
557 nature of median eminence and medial arcuate nucleus BBB by testing the distribution of  
558 hydroxystilbamidine and wheat germ agglutinin after intravenous injection [65]. They found that  
559 hydroxystilbamidine was taken into the median eminence and medial part of the arcuate nucleus, while

560 the wheat germ agglutinin diffusely distributed in the arcuate nucleus and median eminence following  
561 intravenous injection. Furthermore, Morita and Miyata reported the accessibility of low molecular  
562 weight blood-derived molecules to the parenchyma in the median eminence and arcuate nucleus [67].  
563 The hypothermia effect caused by NT binding to NT receptor is likely to be mediated in the  
564 hypothalamus [46]. Young et al. explored the distribution of NT receptors in rat brains and found  
565 moderate to high density of NT receptors in hypothalamus. The hypothermia effect was induced when  
566 NT was injected to medial, lateral preoptic and anterior area of the hypothalamus. Thus, the dissociation  
567 between robust NT-mediated hypothermia effects vs. negligible binding to amyloid plaques in cortex  
568 after IV injection could be explained by a relatively leaky hypothalamic BBB. Future studies will be  
569 required to directly test this possibility.

570

571 Also, in this study, the minimum required dose for NT induced temperature effect was about 20-fold  
572 higher than Stocki et al. [39]. The relationship between the amount of VHHs needed for NT-induced  
573 hypothermia CNS effect and the amount of VHHs required to label and visualize the amyloid plaques is  
574 unclear. Meanwhile, the affinity of the anti-A $\beta$  VHH Nb3-Nb3 was measured to be around 9-10nM,  
575 which is about 10-fold lower than the affinity of anti-TfR VHH M1<sub>P96H</sub>. Higher affinity A $\beta$  binding  
576 antibodies would be required to assess the role of differential affinity for A $\beta$  vs TfR. Because TfR is also  
577 expressed on other brain cells such as choroid plexus epithelial cells and neurons [68], it is possible that  
578 the M1<sub>P96H</sub>-Triplet-NT crosses the blood CSF barrier and engages with periventricular hypothalamic NT  
579 receptors more effectively than it cross the blood brain barrier to interact with parenchymal A $\beta$ . Anti-  
580 TfR antibodies such as OX-26 and 8D3 could be tested as a positive control to explore the correlation  
581 between NT induced hypothermia and brain target (A $\beta$ ) engagement in the future [19, 21]. The absolute  
582 amount of anti-TfR positive controls and VHH-Triplet in the brain parenchyma after crossing the BBB will  
583 be accessed using ELISA after separating brain capillaries and brain parenchyma [39, 69].



584

## 585 **Limitations**

586 There are several limitations of this study. First, although the M1<sub>P96H</sub>-NT induced substantial  
587 hypothermia, the kinetics of this anti-mTfR VHH variant have not been fully optimized. **Fig 2** shows that  
588 the dissociation rate of the M1<sub>P96H</sub> from mTfR was  $1.33 \times 10^{-4}$  which could be still too low. Based on  
589 Hultqvist et al., after the VHH binds to the TfR and the complex is internalized, the VHH needs to  
590 dissociate from the TfR to get released efficiently into the brain parenchyma [22]. When the dissociation  
591 rate is too slow, VHHs may not unbind from the TfR and not get released into the brain parenchyma.  
592 Second, it is possible that dye modification with Alexa 647 affected BBB transcytosis even though it did  
593 not affect mTfR binding affinity *in vitro* (**S8 Fig**). Alternative labeling strategies will need to be tested in  
594 future experiments. Reduction in autofluorescence due to lipofuscin [70] may also improve the  
595 sensitivity of fluorescent dye-based detection methods. Third, to match the maximum hypothermia  
596 effect, 2hr post injection was chosen as the terminal time point to access brain target engagement.  
597 However, this time point may not be optimal. Multiple time points post injection will need to be tested  
598 to find the optimal terminal time point for brain target engagement studies. Fourth, the APP/PS1 mice  
599 used in the study can also develop astrogliosis [71]. It is possible that the astrogliosis around the plaques  
600 could impair BBB transcytosis. Fifth, we do not know the mTfR binding epitope of M1, though it does not  
601 appear to interfere with transferrin binding (not shown). Also, it is formally possible, though unlikely,  
602 that older APP/PS1 transgenic mice have a less permeable BBB than young WT mice; we have not  
603 directly tested hypothermia effects in older APP/PS1 mice. A minor limitation is that the temperature  
604 measurement was conducted using an infrared thermometer. Although belly fur was removed to  
605 decrease variation and increase the accuracy and precision of temperature measurement, the use of  
606 infrared thermometer to measure belly temperature still introduces inter- and intra- user error. Also,  
607 the mice need to be anesthetized for acquisition of a steady temperature using the thermometer.

608 Although we kept the anesthesia time short (about 20 sec) each time to minimize the influence of  
609 anesthesia on mouse body temperature. The use of anesthesia still introduced extra variations. Other  
610 temperature measurement methods such as the use of implanted thermometers which provide real-  
611 time temperature readings and eliminate interference with mice should be considered for future  
612 experiments. Finally, we acknowledge that only one brain section posterior to bregma was analyzed for  
613 each mouse. More brain sections for each mouse which cover additional brain areas, including  
614 hypothalamus, will need to be imaged and analyzed in the future.

615

## 616 **Future directions**

617 There are many important future directions for this line of investigation. We are in the process of  
618 screening other VHH variants for anti-mTfR and anti hTfR-mediated BBB transcytosis. Because the NT  
619 induced hypothermia effect does not correspond to target engagement of targets in other brain areas  
620 like cortex, an alternative, efficient approach to assess BBB transcytosis is needed. To allow high  
621 throughput testing and prediction of therapeutic and diagnostic agent delivery to the CNS, *in vitro* BBB  
622 models have been used. Cecchelli et al. developed a human *in vitro* BBB model using cord blood-derived  
623 hematopoietic stem cells [72]. This model shows good correlation between *in vitro* predicted ratio of  
624 unbound drug concentration in brain and *in vivo* ratio reported in humans. Shayan et al. made a murine  
625 *in vitro* BBB model using murine brain microvascular endothelial cells which also shows good correlation  
626 of compound permeability compared with *in vivo* values [73]. However, these *in vitro* models do not  
627 always reflect the *in vivo* BBB function. Garberg et al. evaluated multiple different *in vitro* models in  
628 comparison with an *in vivo* mouse brain uptake assay to understand the *in vitro* models' potential to  
629 predict *in vivo* transport of compounds across BBB [41]. Low correlations between *in vitro* and *in vivo*  
630 data were obtained with a total of twenty-two compounds. Because of the complexity of the *in vivo*  
631 environment, *in vitro* BBB models were not recommended to be used in isolation to assess target

632 engagement in brain [74]. There are many other methods to assess BBB transcytosis. For example,  
633 Stocki et al. tested the BBB transcytosis of a variable domain of new antigen receptors (VNAR) TXB2 by  
634 fractionating capillaries from the brain parenchyma and measured the concentration in capillaries and  
635 brain parenchyma [39]. Yu et al. assessed the uptake of an anti-TfR antibody by homogenizing the brain  
636 target areas and measuring the antibody concentration with ELISA [17]. A new screening platform will  
637 need to be established and tested in the future to facilitate of the discovery of optimal anti-mTfR VHHs.

638

639 In this study, the VHHs were produced in *E. Coli*. and contaminated by endotoxins in the outer  
640 membrane of this gram-negative bacteria [57]. Extra steps were required to remove endotoxin from the  
641 VHHs. In the future, VHHs will be produced in yeast which has high yield for VHH production and avoid  
642 contaminating VHHs with endotoxins [75]. Also, the immunogenicity and toxicity profiles of these  
643 foreign protein constructs will be assessed.

644

645 Previous research found that anti-TfR antibodies could cause a reduction of reticulocyte count and acute  
646 clinical signs [76]. There were no apparent safety concerns raised during the experiments reported here.  
647 However, the safety profile of the VHHs will be formally assessed in the future to make sure that the  
648 binding of VHHs to the mTfR does not cause reticulocyte reduction or interfere with physiological iron  
649 uptake [77].

650

651 In addition, extension of VHH fusion protein half-life in the circulation may improve BBB transcytosis.  
652 The half-life of single VHHs and VHH triplets was measured to be 2-3 minutes in the mouse after IV  
653 injection [78]. The lack of differences in brain signal may be caused by the fast clearance of the VHHs,  
654 which did not allow enough VHHs to bind to the TfR on the brain endothelial cells. Conjugation of the

655 VHHs to albumin binding domains, immunoglobulin Fc domains or PEG to slow down VHH clearance and  
656 enhance blood residence time will be tested in the future [79-81].  
657 While not directly related to the main aims of the project involving development of brain MRI molecular  
658 contrast agents, the mechanisms underlying potential differences in BBB function in the hypothalamus  
659 vs. cortex are worthy of further investigation. To begin, target engagement of the Triplet-647 in  
660 hypothalamus will need to be assessed. The hypothalamus area of the brain sections will be imaged with  
661 confocal microscope and analyzed using ImageJ. Then, the M1<sub>P96H</sub> could be conjugated to nanobodies  
662 against another widely distributed endogenous target such as the ATP-gated ion channel P2X7, which is  
663 widely distributed throughout the brain [82]. M1<sub>P96H</sub>-anti P2X7 VHH fusion would then be intravenously  
664 injected to mice and its target engagement in cortex and hypothalamus would be assessed and  
665 compared. Furthermore, different sizes of dextrans could be intravenously injected to the mice to  
666 understand the BBB penetration capacity in hypothalamus and other brain regions [67].

667  
668 The ultimate goal of this study is to develop a family of molecular MRI contrast agents for diagnosis and  
669 assessment of neurodegenerative diseases. Misdiagnosis of neurodegenerative diseases is common  
670 because of their heterogeneous nature [83]. Early diagnosis of neurodegenerative diseases could help  
671 with early treatments and delay hospitalization, and accurate identification of target populations could  
672 help with the development of new treatments [83, 84]. MRI has been widely used for imaging  
673 neurodegenerative diseases; however, structural MRI provides indirect and nonspecific measurements.  
674 Neurodegenerative diseases are characterized by abnormal accumulation of misfolded proteins  
675 including  $\alpha$ -synuclein, tau, TDP-43 and Huntingtin in the CNS. Novel families of MRI contrast agents with  
676 VHH and IONPs would allow visualization of pathologically specific biomarkers in the living human brain:  
677 each VHH would bind to the misfolded proteins while the IONPs provide T1 MRI signals. We have  
678 characterized the *in vivo* pharmacokinetics of the contrast agent and optimized the MRI sequence for

679 MR T1 imaging [78, 85], but have not optimized BBB transcytosis of contrast agents. IONPs have been  
680 widely in a research context as MRI molecular contrast agents but are not typically used in clinical  
681 practice. Liu et al., developed an oligomer-specific scFv antibody W20 conjugated superparamagnetic  
682 iron oxide nanoparticles which specifically bound to oligomers in transgenic mouse models of  
683 Parkinson's disease or Huntington's disease and provided MRI signals [86]. Sillerud et al. synthesized an  
684 anti-A $\beta$ PP conjugated superparamagnetic iron oxide nanoparticle for MRI detection of amyloid plaques  
685 in AD [87]. However, none of these contrast agents have provided optimal BBB penetration to allow high  
686 quality *in vivo* imaging. The ability of molecular contrast agents to cross the BBB and bind to brain  
687 targets in sufficient quantity to give conspicuous MRI signals will need be tested with *in vivo* MR imaging  
688 in the future.

689

## 690 **Conclusions**

691 This study used a NT based modular system to screen anti-mTfR VHHs for transferrin receptor mediated  
692 transcytosis across BBB. A M1 variant, M1<sub>P96H</sub>, was identified with good performance in inducing  
693 hypothermia, an effect which requires crossing the BBB. This M1 variant was fused to the anti-A $\beta$  VHH  
694 dimer and labeled with Alexa 647. Surprisingly, however, the dye labelled VHH did not show detectible  
695 labeling of amyloid plaques compared with controls after intravenous injection into transgenic mice.  
696 Other methods assessing VHH BBB transcytosis will need to be developed for screening VHHs to  
697 facilitate the development of MRI molecular contrast agents.

698

699

## 700 **Acknowledgements**

701 This research was supported by the Intramural Research Program of the NIH, NINDS. We thank Dr. Alan  
702 Koretsky for providing a supportive intellectual environment. We thank the NHLBI Biophysics Core  
703 Facility for the use of BLI instrument. We thank the NINDS Light Imaging Facility for use of the confocal  
704 microscope. We thank Elvira Rodionova and Caroline Francescutti for expressing the VHHs. We thank Dr.  
705 Yoshimi Enose-Akahata for assistance with the blinded experiment. The first author would like to thank  
706 her PhD thesis committee, Dr. Philip Bayly, Dr. Dennis Barbour, Dr. Hongyu An and Dr. Vijay Sharma for  
707 insightful suggestions.

708

## 709 **Disclaimer**

710 The authors have no conflicts of interest to disclose. The views, information or content, and conclusions  
711 presented do not necessarily represent the official position or policy, nor should any official  
712 endorsement be inferred, on the part of the National Institutes of Health, the Uniformed Services  
713 University, the Department of Defense, Henry M. Jackson Foundation for the Advancement of Military  
714 Medicine, Inc., or other government agency.

715

## 716 **Availability of data and materials**

717 The datasets used and/or analyzed during the current study are available from the corresponding author  
718 on reasonable request.

## 719 **Authors' contributions**

720 **Conceptualization:** Shiran Su, Thomas J. Esparza, David L. Brody.

721 **Data curation:** Shiran Su, Thomas J. Esparza.

722 **Formal analysis:** Shiran Su, Thomas J. Esparza.

723 **Funding acquisition:** David L. Brody.

724 **Investigation:** Shiran Su, Thomas J. Esparza.

725 **Methodology:** Shiran Su, Thomas J. Esparza.

726 **Resources:** Thomas J. Esparza.

727 **Software:** Shiran Su.

728 **Writing – original draft:** Shiran Su, David L. Brody.

729 **Writing – review & editing:** Shiran Su, Thomas J. Esparza, David L. Brody

730

## 731 **References**

- 732 1. LaFerla FM, Oddo S. Alzheimer's disease: Abeta, tau and synaptic dysfunction. *Trends Mol Med.*  
733 2005;11(4):170-6.
- 734 2. The Alzheimer's Association. 2021 Alzheimer's disease facts and figures. *Alzheimers Dement.*  
735 2021;17(3):327-406.
- 736 3. Graham WV, Bonito-Oliva A, Sakmar TP. Update on Alzheimer's Disease Therapy and Prevention  
737 Strategies. *Annu Rev Med.* 2017;68:413-30.
- 738 4. Takizawa C, Thompson PL, van Walsem A, Faure C, Maier WC. Epidemiological and economic  
739 burden of Alzheimer's disease: a systematic literature review of data across Europe and the United  
740 States of America. *J Alzheimers Dis.* 2015;43(4):1271-84.
- 741 5. Risacher SL, Saykin AJ. Neuroimaging and other biomarkers for Alzheimer's disease: the  
742 changing landscape of early detection. *Annu Rev Clin Psychol.* 2013;9:621-48.
- 743 6. Clark CM, Davatzikos C, Borthakur A, Newberg A, Leight S, Lee VM, et al. Biomarkers for early  
744 detection of Alzheimer pathology. *Neurosignals.* 2008;16(1):11-8.
- 745 7. Beach TG, Monsell SE, Phillips LE, Kukull W. Accuracy of the clinical diagnosis of Alzheimer  
746 disease at National Institute on Aging Alzheimer Disease Centers, 2005-2010. *J Neuropathol Exp Neurol.*  
747 2012;71(4):266-73.
- 748 8. Wurtman R. Biomarkers in the diagnosis and management of Alzheimer's disease. *Metabolism.*  
749 2015;64(3 Suppl 1):S47-50.
- 750 9. ten Kate M, Redolfi A, Peira E, Bos I, Vos SJ, Vandenberghe R, et al. MRI predictors of amyloid  
751 pathology: results from the EMIF-AD Multimodal Biomarker Discovery study. *Alzheimer's Research &*  
752 *Therapy.* 2018;10(1):100.

- 753 10. Morris E, Chalkidou A, Hammers A, Peacock J, Summers J, Keevil S. Diagnostic accuracy of <sup>18</sup>F  
754 amyloid PET tracers for the diagnosis of Alzheimer's disease: a systematic review and meta-analysis.  
755 *European Journal of Nuclear Medicine and Molecular Imaging*. 2016;43(2):374-85.
- 756 11. Lee G, Dallas S, Hong M, Bendayan R. Drug transporters in the central nervous system: brain  
757 barriers and brain parenchyma considerations. *Pharmacol Rev*. 2001;53(4):569-96.
- 758 12. Pardridge WM. Drug and gene targeting to the brain with molecular Trojan horses. *Nat Rev Drug*  
759 *Discov*. 2002;1(2):131-9.
- 760 13. Oller-Salvia B, Sánchez-Navarro M, Giralt E, Teixidó M. Blood-brain barrier shuttle peptides: an  
761 emerging paradigm for brain delivery. *Chem Soc Rev*. 2016;45(17):4690-707.
- 762 14. Malakoutikhah M, Teixidó M, Giralt E. Shuttle-mediated drug delivery to the brain. *Angew Chem*  
763 *Int Ed Engl*. 2011;50(35):7998-8014.
- 764 15. Bien-Ly N, Yu YJ, Bumbaca D, Elstrott J, Boswell CA, Zhang Y, et al. Transferrin receptor (TfR)  
765 trafficking determines brain uptake of TfR antibody affinity variants. *J Exp Med*. 2014;211(2):233-44.
- 766 16. Gupta Y, Jain A, Jain SK. Transferrin-conjugated solid lipid nanoparticles for enhanced delivery of  
767 quinine dihydrochloride to the brain. *J Pharm Pharmacol*. 2007;59(7):935-40.
- 768 17. Yu YJ, Zhang Y, Kenrick M, Hoyte K, Luk W, Lu Y, et al. Boosting brain uptake of a therapeutic  
769 antibody by reducing its affinity for a transcytosis target. *Sci Transl Med*. 2011;3(84):84ra44.
- 770 18. Wiley DT, Webster P, Gale A, Davis ME. Transcytosis and brain uptake of transferrin-containing  
771 nanoparticles by tuning avidity to transferrin receptor. *Proc Natl Acad Sci U S A*. 2013;110(21):8662-7.
- 772 19. Jefferies WA, Brandon MR, Hunt SV, Williams AF, Gatter KC, Mason DY. Transferrin receptor on  
773 endothelium of brain capillaries. *Nature*. 1984;312(5990):162-3.
- 774 20. Pardridge WM, Buciak JL, Friden PM. Selective transport of an anti-transferrin receptor antibody  
775 through the blood-brain barrier in vivo. *J Pharmacol Exp Ther*. 1991;259(1):66-70.
- 776 21. Kissel K, Hamm S, Schulz M, Vecchi A, Garlanda C, Engelhardt B. Immunohistochemical  
777 localization of the murine transferrin receptor (TfR) on blood-tissue barriers using a novel anti-TfR  
778 monoclonal antibody. *Histochemistry and Cell Biology*. 1998;110(1):63-72.
- 779 22. Hultqvist G, Syvänen S, Fang XT, Lannfelt L, Sehlin D. Bivalent Brain Shuttle Increases Antibody  
780 Uptake by Monovalent Binding to the Transferrin Receptor. *Theranostics*. 2017;7(2):308-18.
- 781 23. Song Y, Du D, Li L, Xu J, Dutta P, Lin Y. In Vitro Study of Receptor-Mediated Silica Nanoparticles  
782 Delivery across Blood-Brain Barrier. *ACS Appl Mater Interfaces*. 2017;9(24):20410-6.
- 783 24. Hamers-Casterman C, Atarhouch T, Muyldermans S, Robinson G, Hamers C, Songa EB, et al.  
784 Naturally occurring antibodies devoid of light chains. *Nature*. 1993;363(6428):446-8.
- 785 25. Hassanzadeh-Ghassabeh G, Devoogdt N, De Pauw P, Vincke C, Muyldermans S. Nanobodies and  
786 their potential applications. *Nanomedicine (Lond)*. 2013;8(6):1013-26.
- 787 26. Harmsen MM, De Haard HJ. Properties, production, and applications of camelid single-domain  
788 antibody fragments. *Appl Microbiol Biotechnol*. 2007;77(1):13-22.
- 789 27. van der Linden RH, Frenken LG, de Geus B, Harmsen MM, Ruuls RC, Stok W, et al. Comparison of  
790 physical chemical properties of llama VHH antibody fragments and mouse monoclonal antibodies.  
791 *Biochim Biophys Acta*. 1999;1431(1):37-46.
- 792 28. Oliveira S, van Dongen GA, Stigter-van Walsum M, Roovers RC, Stam JC, Mali W, et al. Rapid  
793 visualization of human tumor xenografts through optical imaging with a near-infrared fluorescent anti-  
794 epidermal growth factor receptor nanobody. *Mol Imaging*. 2012;11(1):33-46.
- 795 29. Stijlemans B, Conrath K, Cortez-Retamozo V, Van Xong H, Wyns L, Senter P, et al. Efficient  
796 targeting of conserved cryptic epitopes of infectious agents by single domain antibodies. African  
797 trypanosomes as paradigm. *J Biol Chem*. 2004;279(2):1256-61.
- 798 30. Rossotti MA, Bélanger K, Henry KA, Tanha J. Immunogenicity and humanization of single-domain  
799 antibodies. *Febs j*. 2021.



- 800 31. Ackaert C, Smiejkowska N, Xavier C, Sterckx YGJ, Denies S, Stijlemans B, et al. Immunogenicity  
801 Risk Profile of Nanobodies. *Front Immunol.* 2021;12:632687.
- 802 32. Food and Drug Administration. FDA approved caplacizumab-yhdp. February 2019.
- 803 33. Ishiwatari-Ogata C, Kyuuma M, Ogata H, Yamakawa M, Iwata K, Ochi M, et al. Ozoralizumab, a  
804 Humanized Anti-TNF $\alpha$  NANOBODY<sup>®</sup> Compound, Exhibits Efficacy Not Only at the Onset of Arthritis in a  
805 Human TNF Transgenic Mouse but Also During Secondary Failure of Administration of an Anti-TNF $\alpha$  IgG.  
806 *Frontiers in Immunology.* 2022;13.
- 807 34. D'Huyvetter M, Vos J, Caveliers V, Vaneycken I, Heemskerk J, Duhoux FP, et al. Phase I Trial of  
808 (131)I-GMIB-Anti-HER2-VHH1, a New Promising Candidate for HER2-Targeted Radionuclide Therapy in  
809 Breast Cancer Patients. *J Nucl Med.* 2021;62(8):1097-105.
- 810 35. Sheff J, Wang P, Xu P, Arbour M, Masson L, van Faassen H, et al. Defining the epitope of a  
811 blood-brain barrier crossing single domain antibody specific for the type 1 insulin-like growth factor  
812 receptor. *Scientific Reports.* 2021;11(1):4284.
- 813 36. Stanimirovic DKK, K.; Haqqani, A.S.; Sulea, T.; Arbabi-Ghahroudi, M.; Massie, B.; Gilbert, R.,  
814 inventor/Insulin-like growth factor 1 receptor-specific antibodies and uses thereof patent  
815 US10100117B2. 2018.
- 816 37. Danis C, Dupré E, Zejneli O, Caillierez R, Arrial A, Bégard S, et al. Inhibition of Tau seeding by  
817 targeting Tau nucleation core within neurons with a single domain antibody fragment. *Mol Ther.*  
818 2022;30(4):1484-99.
- 819 38. Dupré E, Danis C, Arrial A, Hanouille X, Homa M, Cantrelle FX, et al. Single Domain Antibody  
820 Fragments as New Tools for the Detection of Neuronal Tau Protein in Cells and in Mice Studies. *ACS*  
821 *Chem Neurosci.* 2019;10(9):3997-4006.
- 822 39. Stocki P, Szary J, Rasmussen CLM, Demydchuk M, Northall L, Logan DB, et al. Blood-brain barrier  
823 transport using a high affinity, brain-selective VNAR antibody targeting transferrin receptor 1. *Faseb j.*  
824 2021;35(2):e21172.
- 825 40. Wu D, Yang J, Pardridge WM. Drug targeting of a peptide radiopharmaceutical through the  
826 primate blood-brain barrier in vivo with a monoclonal antibody to the human insulin receptor. *J Clin*  
827 *Invest.* 1997;100(7):1804-12.
- 828 41. Garberg P, Ball M, Borg N, Cecchelli R, Fenart L, Hurst RD, et al. In vitro models for the blood-  
829 brain barrier. *Toxicol In Vitro.* 2005;19(3):299-334.
- 830 42. Carraway R, Leeman SE. The isolation of a new hypotensive peptide, neurotensin, from bovine  
831 hypothalamus. *J Biol Chem.* 1973;248(19):6854-61.
- 832 43. Ratner C, Skov LJ, Raida Z, Bächler T, Bellmann-Sickert K, Le Foll C, et al. Effects of Peripheral  
833 Neurotensin on Appetite Regulation and Its Role in Gastric Bypass Surgery. *Endocrinology.*  
834 2016;157(9):3482-92.
- 835 44. Martin GE, Bacino CB, Papp NL. Hypothermia elicited by the intracerebral microinjection of  
836 neurotensin. *Peptides.* 1980;1(4):333-9.
- 837 45. Kokko KP, Hadden MK, Price KL, Orwig KS, See RE, Dix TA. In vivo behavioral effects of stable,  
838 receptor-selective neurotensin[8-13] analogues that cross the blood-brain barrier. *Neuropharmacology.*  
839 2005;48(3):417-25.
- 840 46. Young WS, 3rd, Kuhar MJ. Neurotensin receptor localization by light microscopic  
841 autoradiography in rat brain. *Brain Res.* 1981;206(2):273-85.
- 842 47. Bissette G, Nemeroff CB, Loosen PT, Prange AJ, Lipton MA. Hypothermia and intolerance to cold  
843 induced by intracisternal administration of the hypothalamic peptide neurotensin. *Nature.*  
844 1976;262(5569):607-9.
- 845 48. Wouters Y, Jaspers T, De Strooper B, Dewilde M. Identification and in vivo characterization of a  
846 brain-penetrating nanobody. *Fluids Barriers CNS.* 2020;17(1):62.

- 847 49. Esparza TJ, Martin NP, Anderson GP, Goldman ER, Brody DL. High affinity nanobodies block  
848 SARS-CoV-2 spike receptor binding domain interaction with human angiotensin converting enzyme.  
849 Scientific Reports. 2020;10(1):22370.
- 850 50. Pardon E, Laeremans T, Triest S, Rasmussen SGF, Wohlkönig A, Ruf A, et al. A general protocol  
851 for the generation of Nanobodies for structural biology. Nature Protocols. 2014;9(3):674-93.
- 852 51. Paraschiv G, Vincke C, Czaplewska P, Manea M, Muyldermans S, Przybylski M. Epitope structure  
853 and binding affinity of single chain llama anti- $\beta$ -amyloid antibodies revealed by proteolytic excision  
854 affinity-mass spectrometry. J Mol Recognit. 2013;26(1):1-9.
- 855 52. Martin AC. Accessing the Kabat antibody sequence database by computer. Proteins.  
856 1996;25(1):130-3.
- 857 53. Quan S, Hiniker A, Collet JF, Bardwell JC. Isolation of bacteria envelope proteins. Methods Mol  
858 Biol. 2013;966:359-66.
- 859 54. Jankowsky JL, Fadale DJ, Anderson J, Xu GM, Gonzales V, Jenkins NA, et al. Mutant presenilins  
860 specifically elevate the levels of the 42 residue beta-amyloid peptide in vivo: evidence for augmentation  
861 of a 42-specific gamma secretase. Hum Mol Genet. 2004;13(2):159-70.
- 862 55. Jankowsky JL, Slunt HH, Ratovitski T, Jenkins NA, Copeland NG, Borchelt DR. Co-expression of  
863 multiple transgenes in mouse CNS: a comparison of strategies. Biomol Eng. 2001;17(6):157-65.
- 864 56. Styren SD, Hamilton RL, Styren GC, Klunk WE. X-34, a fluorescent derivative of Congo red: a  
865 novel histochemical stain for Alzheimer's disease pathology. J Histochem Cytochem. 2000;48(9):1223-  
866 32.
- 867 57. Mamat U, Wilke K, Bramhill D, Schromm AB, Lindner B, Kohl TA, et al. Detoxifying Escherichia  
868 coli for endotoxin-free production of recombinant proteins. Microbial Cell Factories. 2015;14(1):57.
- 869 58. Varatharaj A, Galea I. The blood-brain barrier in systemic inflammation. Brain Behav Immun.  
870 2017;60:1-12.
- 871 59. Food and Drug Administration. Bacterial Endotoxins/Pyrogens.  
872 [https://www.fda.gov/inspections-compliance-enforcement-and-criminal-investigations/inspection-](https://www.fda.gov/inspections-compliance-enforcement-and-criminal-investigations/inspection-technical-guides/bacterial-endotoxinspyrogens)  
873 [technical-guides/bacterial-endotoxinspyrogens](https://www.fda.gov/inspections-compliance-enforcement-and-criminal-investigations/inspection-technical-guides/bacterial-endotoxinspyrogens). November 2014.
- 874 60. Schröter C, Günther R, Rhiel L, Becker S, Toleikis L, Doerner A, et al. A generic approach to  
875 engineer antibody pH-switches using combinatorial histidine scanning libraries and yeast display. MAbs.  
876 2015;7(1):138-51.
- 877 61. Maeda K, Kato Y, Sugiyama Y. pH-dependent receptor/ligand dissociation as a determining  
878 factor for intracellular sorting of ligands for epidermal growth factor receptors in rat hepatocytes. J  
879 Control Release. 2002;82(1):71-82.
- 880 62. Tyler-McMahon BM, Boules M, Richelson E. Neurotensin: peptide for the next millennium. Regul  
881 Pept. 2000;93(1-3):125-36.
- 882 63. Morrison SF. Central control of body temperature. F1000Res. 2016;5.
- 883 64. Yoo S, Blackshaw S. Regulation and function of neurogenesis in the adult mammalian  
884 hypothalamus. Prog Neurobiol. 2018;170:53-66.
- 885 65. Cheunsuang O, Stewart AL, Morris R. Differential uptake of molecules from the circulation and  
886 CSF reveals regional and cellular specialisation in CNS detection of homeostatic signals. Cell and Tissue  
887 Research. 2006;325(2):397-402.
- 888 66. Haddad-Tóvulli R, Dragano NRV, Ramalho AFS, Velloso LA. Development and Function of the  
889 Blood-Brain Barrier in the Context of Metabolic Control. Front Neurosci. 2017;11:224.
- 890 67. Morita S, Miyata S. Accessibility of low-molecular-mass molecules to the median eminence and  
891 arcuate hypothalamic nucleus of adult mouse. Cell Biochem Funct. 2013;31(8):668-77.
- 892 68. Moos T, Morgan EH. Transferrin and Transferrin Receptor Function in Brain Barrier Systems.  
893 Cellular and Molecular Neurobiology. 2000;20(1):77-95.

- 894 69. Triguero D, Buciak J, Pardridge WM. Capillary depletion method for quantification of blood-brain  
895 barrier transport of circulating peptides and plasma proteins. *J Neurochem.* 1990;54(6):1882-8.
- 896 70. Chen C, Liang Z, Zhou B, Li X, Lui C, Ip NY, et al. In Vivo Near-Infrared Two-Photon Imaging of  
897 Amyloid Plaques in Deep Brain of Alzheimer's Disease Mouse Model. *ACS Chem Neurosci.*  
898 2018;9(12):3128-36.
- 899 71. Kamphuis W, Mamber C, Moeton M, Kooijman L, Sluijs JA, Jansen AH, et al. GFAP isoforms in  
900 adult mouse brain with a focus on neurogenic astrocytes and reactive astrogliosis in mouse models of  
901 Alzheimer disease. *PLoS One.* 2012;7(8):e42823.
- 902 72. Cecchelli R, Aday S, Sevin E, Almeida C, Culot M, Dehouck L, et al. A stable and reproducible  
903 human blood-brain barrier model derived from hematopoietic stem cells. *PLoS One.* 2014;9(6):e99733.
- 904 73. Shayan G, Choi YS, Shusta EV, Shuler ML, Lee KH. Murine in vitro model of the blood-brain  
905 barrier for evaluating drug transport. *Eur J Pharm Sci.* 2011;42(1-2):148-55.
- 906 74. Stanimirovic DB, Bani-Yaghoub M, Perkins M, Haqqani AS. Blood-brain barrier models: in vitro to  
907 in vivo translation in preclinical development of CNS-targeting biotherapeutics. *Expert Opin Drug Discov.*  
908 2015;10(2):141-55.
- 909 75. Gorlani A, Brouwers J, McConville C, van der Bijl P, Malcolm K, Augustijns P, et al. Llama  
910 antibody fragments have good potential for application as HIV type 1 topical microbicides. *AIDS Res*  
911 *Hum Retroviruses.* 2012;28(2):198-205.
- 912 76. Couch JA, Yu YJ, Zhang Y, Tarrant JM, Fuji RN, Meilandt WJ, et al. Addressing safety liabilities of  
913 TfR bispecific antibodies that cross the blood-brain barrier. *Sci Transl Med.* 2013;5(183):183ra57, 1-12.
- 914 77. Gadkar K, Yadav DB, Zuchero JY, Couch JA, Kanodia J, Kenrick MK, et al. Mathematical PKPD and  
915 safety model of bispecific TfR/BACE1 antibodies for the optimization of antibody uptake in brain. *Eur J*  
916 *Pharm Biopharm.* 2016;101:53-61.
- 917 78. Su S, Esparza TJ, Nguyen D, Mastrogiacomo S, Kim JH, Brody DL. Pharmacokinetics of Single  
918 Domain Antibodies and Conjugated Nanoparticles Using a Hybrid near Infrared Method. *Int J Mol Sci.*  
919 2021;22(16).
- 920 79. van Faassen H, Ryan S, Henry KA, Raphael S, Yang Q, Rossotti MA, et al. Serum albumin-binding  
921 V(H) Hs with variable pH sensitivities enable tailored half-life extension of biologics. *Faseb j.*  
922 2020;34(6):8155-71.
- 923 80. Rotman M, Welling MM, van den Boogaard ML, Moursel LG, van der Graaf LM, van Buchem MA,  
924 et al. Fusion of hIgG1-Fc to 111In-anti-amyloid single domain antibody fragment VHH-pa2H prolongs  
925 blood residential time in APP/PS1 mice but does not increase brain uptake. *Nucl Med Biol.*  
926 2015;42(8):695-702.
- 927 81. Li Q, Barrett A, Vijaykrishnan B, Tiberghien A, Beard R, Rickert KW, et al. Improved Inhibition of  
928 Tumor Growth by Diabody-Drug Conjugates via Half-Life Extension. *Bioconjug Chem.* 2019;30(4):1232-  
929 43.
- 930 82. Lord B, Ameriks MK, Wang Q, Fourgeaud L, Vliegen M, Verluyten W, et al. A novel radioligand  
931 for the ATP-gated ion channel P2X7: [3H] JNJ-54232334. *Eur J Pharmacol.* 2015;765:551-9.
- 932 83. Basak I, Patil KS, Alves G, Larsen JP, Møller SG. microRNAs as neuroregulators, biomarkers and  
933 therapeutic agents in neurodegenerative diseases. *Cell Mol Life Sci.* 2016;73(4):811-27.
- 934 84. Koikkalainen J, Rhodius-Meester H, Tolonen A, Barkhof F, Tijms B, Lemstra AW, et al. Differential  
935 diagnosis of neurodegenerative diseases using structural MRI data. *Neuroimage Clin.* 2016;11:435-49.
- 936 85. Kim JH, Dodd S, Ye FQ, Knutsen AK, Nguyen D, Wu H, et al. Sensitive detection of extremely  
937 small iron oxide nanoparticles in living mice using MP2RAGE with advanced image co-registration.  
938 *Scientific Reports.* 2021;11(1):106.
- 939 86. Liu XG, Lu S, Liu DQ, Zhang L, Zhang LX, Yu XL, et al. ScFv-conjugated superparamagnetic iron  
940 oxide nanoparticles for MRI-based diagnosis in transgenic mouse models of Parkinson's and  
941 Huntington's diseases. *Brain Res.* 2019;1707:141-53.

942 87. Sillerud LO, Solberg NO, Chamberlain R, Orlando RA, Heidrich JE, Brown DC, et al. SPION-  
943 enhanced magnetic resonance imaging of Alzheimer's disease plaques in A $\beta$ PP/PS-1 transgenic mouse  
944 brain. *J Alzheimers Dis.* 2013;34(2):349-65.

945

946
